# Supplementary material for: Structural parameter-modulated nonlinear optical amplitude of acceptor–π–D–π–donor-configured pyrene derivatives: a DFT approach
Source: Royal Society of Chemistry journal article supplement (doi:10.1039/d1ra00876e), 2021-01-01
Supplement: d1ra00876e1.pdf [file d1ra00876e1.pdf]

## Supplementary Information

### Structural Parameters Modulated Nonlinear Optical Amplitude of Acceptor- $\pi$ -D- $\pi$ -Donor Configured Pyrene Derivatives: A DFT Approach

Muhammad Khalid,<sup>\*1</sup> Hafiza Munazza Lodhi,<sup>1</sup> Muhammad Usman Khan,<sup>\*2</sup> Muhammad Imran,<sup>3</sup>

<sup>1</sup>*Department of Chemistry, Khawaja Fareed University of Engineering & Information Technology, Rahim Yar Khan, 64200, Pakistan*

<sup>2</sup>*Department of Chemistry, University of Okara, Okara-56300, Pakistan*

<sup>3</sup>*Department of Chemistry, Faculty of Science, King Khalid University, P.O. Box 9004, Abha 61413, Saudi Arabia.*

\*Corresponding authors E-mail addresses:

Dr. Muhammad Khalid ([muhammad.khalid@kfueit.edu.pk](mailto:muhammad.khalid@kfueit.edu.pk); [Khalid@iq.usp.br](mailto:Khalid@iq.usp.br))

Dr. Muhammad Usman Khan ([usman.chemistry@gmail.com](mailto:usman.chemistry@gmail.com) ; [usmankhan@uo.edu.pk](mailto:usmankhan@uo.edu.pk))

**Table S1:** Cartesian coordinates of MCPTR

| Atom | X-axis   | Y-axis   | Z-axis   |
|------|----------|----------|----------|
| C    | -3.45168 | -2.65703 | 0.260534 |
| C    | -4.81187 | -2.82556 | 0.43042  |
| C    | -5.68739 | -1.74856 | 0.266557 |
| C    | -5.1573  | -0.47855 | -0.09227 |
| C    | -3.75326 | -0.30401 | -0.27515 |
| C    | -2.89681 | -1.41532 | -0.08143 |
| C    | -7.09901 | -1.89431 | 0.450339 |
| C    | -6.04691 | 0.618344 | -0.2755  |
| C    | -7.44625 | 0.445994 | -0.0878  |
| C    | -7.94095 | -0.84506 | 0.282313 |
| C    | -8.29955 | 1.538612 | -0.27116 |
| H    | -9.36943 | 1.399943 | -0.12418 |
| C    | -7.79773 | 2.781622 | -0.63483 |
| C    | -6.43402 | 2.958303 | -0.82525 |
| C    | -5.54489 | 1.892014 | -0.65224 |
| C    | -4.13833 | 2.030431 | -0.86247 |
| C    | -3.2877  | 0.987155 | -0.69061 |
| H    | -2.22946 | 1.129849 | -0.88753 |
| H    | -3.75591 | 2.999167 | -1.17945 |
| H    | -7.48048 | -2.87491 | 0.729808 |
| H    | -2.78006 | -3.49608 | 0.427724 |
| H    | -5.21248 | -3.79813 | 0.71036  |
| H    | -9.01382 | -0.96466 | 0.424058 |
| H    | -8.47684 | 3.61926  | -0.77273 |
| H    | -6.03927 | 3.930773 | -1.11449 |
| C    | 2.359539 | -0.5233  | 0.174609 |
| H    | 3.115744 | -1.18968 | -0.23987 |
| C    | 2.837706 | 0.576879 | 0.816227 |
| C    | 1.9782   | 1.548097 | 1.407477 |
| N    | 1.249094 | 2.323463 | 1.878541 |
| C    | 4.287437 | 0.849676 | 0.946233 |
| O    | 4.742973 | 1.819275 | 1.504935 |
| O    | 5.036862 | -0.10756 | 0.372793 |
| C    | 6.454079 | 0.091934 | 0.456246 |
| C    | 7.11632  | -1.07094 | -0.24274 |
| H    | 6.748238 | 0.15287  | 1.513667 |
| H    | 6.701608 | 1.057538 | -0.00236 |
| C    | 8.632847 | -1.05536 | -0.10274 |
| H    | 6.709798 | -2.00164 | 0.175297 |
| H    | 6.835899 | -1.05657 | -1.30627 |
| H    | 9.040017 | -1.96154 | -0.57421 |
| H    | 8.90519  | -1.12483 | 0.962631 |

|   |          |          |          |
|---|----------|----------|----------|
| C | 9.307256 | 0.165079 | -0.7142  |
| C | 10.82469 | 0.061221 | -0.71436 |
| H | 9.012256 | 1.076374 | -0.17011 |
| H | 8.948684 | 0.303909 | -1.74802 |
| C | 11.49627 | 1.290498 | -1.30104 |
| H | 11.17512 | -0.10236 | 0.316091 |
| H | 11.12368 | -0.83584 | -1.27769 |
| H | 12.58744 | 1.200117 | -1.30267 |
| H | 11.17491 | 1.4581   | -2.33663 |
| H | 11.23806 | 2.190856 | -0.72989 |
| C | 1.021254 | -0.95902 | -0.04562 |
| C | 0.702328 | -2.10779 | -0.74878 |
| S | -0.43429 | -0.15903 | 0.507128 |
| C | -0.67475 | -2.34287 | -0.84818 |
| H | 1.467686 | -2.74572 | -1.18261 |
| C | -1.43978 | -1.37463 | -0.22813 |
| H | -1.11881 | -3.18176 | -1.37527 |

**Table S2:** Cartesian coordinates of MCPTD1

| Atom | X-axis   | Y-axis   | Z-axis   |
|------|----------|----------|----------|
| C    | -6.9636  | -3.4116  | -0.382   |
| C    | -5.66774 | -3.77851 | -0.68565 |
| C    | -4.63824 | -2.83229 | -0.66851 |
| C    | -4.93413 | -1.48969 | -0.30857 |
| C    | -6.27001 | -1.11625 | 0.028371 |
| C    | -7.29351 | -2.09336 | -0.03787 |
| C    | -3.29064 | -3.1841  | -0.98065 |
| C    | -3.88388 | -0.52422 | -0.28113 |
| C    | -2.5554  | -0.88846 | -0.65151 |
| C    | -2.29756 | -2.26019 | -0.97191 |
| C    | -1.54039 | 0.100184 | -0.65276 |
| C    | -1.85344 | 1.397526 | -0.2243  |
| C    | -3.13307 | 1.744778 | 0.16177  |
| C    | -4.16872 | 0.806095 | 0.126269 |
| C    | -5.50142 | 1.141463 | 0.507799 |
| C    | -6.50371 | 0.228386 | 0.463492 |
| H    | -7.49993 | 0.516478 | 0.784266 |
| H    | -5.7     | 2.156528 | 0.847234 |
| H    | -3.0725  | -4.22477 | -1.21494 |
| H    | -7.76231 | -4.14744 | -0.44381 |
| H    | -5.43832 | -4.80646 | -0.96023 |
| H    | -1.27612 | -2.5596  | -1.18674 |
| H    | -1.07019 | 2.152893 | -0.2321  |
| H    | -3.35287 | 2.762907 | 0.477855 |

---

|   |          |          |          |
|---|----------|----------|----------|
| C | -12.3369 | -0.36047 | 0.082756 |
| H | -13.1552 | -0.86664 | 0.594759 |
| C | -12.6763 | 0.779647 | -0.5777  |
| C | -11.7217 | 1.560228 | -1.29283 |
| N | -10.9183 | 2.176556 | -1.86686 |
| C | -14.0624 | 1.299973 | -0.59982 |
| O | -14.3915 | 2.313888 | -1.16866 |
| O | -14.9115 | 0.514259 | 0.084911 |
| C | -16.2744 | 0.959393 | 0.102405 |
| C | -17.0664 | -0.03098 | 0.921356 |
| H | -16.6467 | 1.022683 | -0.93005 |
| H | -16.3093 | 1.974002 | 0.518387 |
| C | -18.5621 | 0.257088 | 0.901896 |
| H | -16.8734 | -1.03809 | 0.528226 |
| H | -16.6932 | -0.02077 | 1.955883 |
| H | -19.0811 | -0.53396 | 1.462343 |
| H | -18.9367 | 0.185582 | -0.13192 |
| C | -18.9501 | 1.610018 | 1.482612 |
| C | -20.4557 | 1.787688 | 1.606756 |
| H | -18.5465 | 2.423564 | 0.859227 |
| H | -18.4831 | 1.73293  | 2.474437 |
| C | -20.8417 | 3.149087 | 2.157954 |
| H | -20.9187 | 1.637081 | 0.61958  |
| H | -20.8604 | 0.99256  | 2.25111  |
| H | -21.9269 | 3.261501 | 2.250639 |
| H | -20.4046 | 3.309544 | 3.151542 |
| H | -20.4783 | 3.954731 | 1.508104 |
| C | -11.0763 | -1.01079 | 0.216773 |
| C | -10.8874 | -2.16715 | 0.95381  |
| S | -9.56457 | -0.48766 | -0.49286 |
| C | -9.56262 | -2.6234  | 0.957313 |
| H | -11.705  | -2.65089 | 1.481704 |
| C | -8.70776 | -1.82043 | 0.228512 |
| H | -9.21739 | -3.502   | 1.493811 |
| C | -0.1759  | -0.18422 | -1.09744 |
| C | 0.263406 | -0.84944 | -2.21567 |
| S | 1.186711 | 0.426375 | -0.19022 |
| C | 1.670315 | -0.86304 | -2.35363 |
| H | -0.42012 | -1.27228 | -2.94668 |
| C | 2.331545 | -0.20897 | -1.34286 |
| H | 2.186718 | -1.31017 | -3.19833 |
| C | 3.767829 | -0.03893 | -1.15769 |
| C | 4.30034  | 1.012271 | -0.39993 |
| C | 4.671165 | -0.93699 | -1.74353 |

---

---

|   |          |          |          |
|---|----------|----------|----------|
| C | 5.665877 | 1.158899 | -0.22647 |
| H | 3.630496 | 1.735933 | 0.062184 |
| C | 6.038044 | -0.78314 | -1.597   |
| H | 4.291519 | -1.77832 | -2.31949 |
| C | 6.559994 | 0.266056 | -0.82927 |
| H | 6.052724 | 1.976877 | 0.376164 |
| H | 6.718762 | -1.48868 | -2.0675  |
| N | 7.950819 | 0.410009 | -0.66443 |
| C | 8.771829 | -0.74017 | -0.54391 |
| C | 9.976048 | -0.81451 | -1.25479 |
| C | 8.383248 | -1.79624 | 0.285464 |
| C | 10.80046 | -1.93022 | -1.14095 |
| H | 10.25583 | 0.018887 | -1.89521 |
| H | 7.448308 | -1.7309  | 0.839694 |
| C | 10.41129 | -2.98434 | -0.33066 |
| H | 11.73474 | -1.9725  | -1.70051 |
| C | 8.541916 | 1.695218 | -0.58706 |
| C | 9.546348 | 1.945314 | 0.352793 |
| C | 8.132952 | 2.712208 | -1.46029 |
| H | 9.858623 | 1.152953 | 1.030941 |
| C | 8.704783 | 3.97946  | -1.39224 |
| H | 7.358516 | 2.496717 | -2.19249 |
| C | 9.706319 | 4.227114 | -0.4678  |
| H | 8.371989 | 4.760329 | -2.07582 |
| C | 10.12748 | 3.20509  | 0.395426 |
| C | 11.18278 | 3.736628 | 1.256382 |
| C | 10.47411 | 5.508248 | -0.21094 |
| C | 9.201251 | -2.91412 | 0.375581 |
| C | 9.046263 | -4.14779 | 1.144777 |
| C | 11.12139 | -4.2968  | -0.06605 |
| C | 10.15999 | -4.96422 | 0.898427 |
| C | 10.26803 | -6.20393 | 1.506958 |
| C | 8.033259 | -4.56726 | 2.00036  |
| C | 9.253603 | -6.62551 | 2.366367 |
| H | 11.13132 | -6.84187 | 1.318253 |
| C | 8.146856 | -5.81335 | 2.609546 |
| H | 7.16807  | -3.93468 | 2.19151  |
| H | 9.325706 | -7.59616 | 2.851598 |
| H | 7.365083 | -6.15807 | 3.282389 |
| C | 11.3987  | 5.079516 | 0.912358 |
| C | 12.35696 | 5.826805 | 1.577374 |
| C | 11.92382 | 3.134361 | 2.267171 |
| C | 13.10102 | 5.22406  | 2.591339 |
| H | 12.52933 | 6.870344 | 1.314183 |

---

|   |          |          |          |
|---|----------|----------|----------|
| C | 12.8852  | 3.889453 | 2.932204 |
| H | 11.75681 | 2.092022 | 2.533505 |
| H | 13.85714 | 5.798751 | 3.12123  |
| H | 13.4743  | 3.434916 | 3.72532  |
| C | 11.26975 | -5.11396 | -1.35196 |
| H | 10.29534 | -5.27879 | -1.82551 |
| H | 11.917   | -4.593   | -2.06889 |
| H | 11.71898 | -6.09266 | -1.14084 |
| C | 12.4913  | -4.07256 | 0.577085 |
| H | 12.96971 | -5.03106 | 0.815208 |
| H | 13.15432 | -3.52564 | -0.10519 |
| H | 12.40013 | -3.49483 | 1.503701 |
| C | 9.538409 | 6.632113 | 0.241345 |
| H | 8.828792 | 6.888404 | -0.55554 |
| H | 8.966346 | 6.333138 | 1.126882 |
| H | 10.10853 | 7.536271 | 0.489798 |
| C | 11.26365 | 5.944762 | -1.44675 |
| H | 10.58492 | 6.185384 | -2.27478 |
| H | 11.8612  | 6.839405 | -1.23025 |
| H | 11.94214 | 5.151086 | -1.77908 |

**Table S3:** Cartesian coordinates of MCPTD2

| Atom | X-axis   | Y-axis   | Z-axis   |
|------|----------|----------|----------|
| C    | 7.168105 | -1.50244 | 3.507513 |
| C    | 5.857444 | -1.49365 | 3.938431 |
| C    | 4.805422 | -1.49386 | 3.016703 |
| C    | 5.099273 | -1.53202 | 1.627047 |
| C    | 6.455481 | -1.54134 | 1.180972 |
| C    | 7.495934 | -1.50643 | 2.14344  |
| C    | 3.442841 | -1.42975 | 3.435384 |
| C    | 4.026529 | -1.55892 | 0.686208 |
| C    | 2.671182 | -1.54813 | 1.131418 |
| C    | 2.424999 | -1.44678 | 2.538427 |
| C    | 1.626449 | -1.60425 | 0.17528  |
| C    | 1.952598 | -1.60989 | -1.18812 |
| C    | 3.263623 | -1.60323 | -1.62077 |
| C    | 4.318152 | -1.59546 | -0.70279 |
| C    | 5.679955 | -1.64538 | -1.12215 |
| C    | 6.699794 | -1.62932 | -0.22742 |
| H    | 7.722419 | -1.69781 | -0.5846  |
| H    | 5.88795  | -1.71043 | -2.18877 |
| H    | 3.236694 | -1.34875 | 4.501317 |
| H    | 7.974286 | -1.45912 | 4.23631  |
| H    | 5.629735 | -1.46395 | 5.002301 |

---

|   |          |          |          |
|---|----------|----------|----------|
| H | 1.39829  | -1.36281 | 2.881994 |
| H | 1.147715 | -1.66168 | -1.91842 |
| H | 3.489504 | -1.62868 | -2.68529 |
| C | 12.47243 | -0.49292 | 0.47965  |
| H | 13.28435 | -1.02135 | 0.975694 |
| C | 11.2284  | -0.8971  | 1.027576 |
| C | 11.19373 | -1.85093 | 2.044124 |
| S | 9.596699 | -0.38609 | 0.63239  |
| C | 9.911651 | -2.16333 | 2.490462 |
| H | 12.1067  | -2.30055 | 2.427112 |
| C | 8.922098 | -1.4629  | 1.818843 |
| H | 9.690799 | -2.89516 | 3.261404 |
| C | 0.2156   | -1.67313 | 0.556744 |
| C | -0.40478 | -2.44303 | 1.510106 |
| S | -0.97272 | -0.74515 | -0.32671 |
| C | -1.81044 | -2.29295 | 1.537712 |
| H | 0.142402 | -3.12841 | 2.151236 |
| H | -2.4547  | -2.81675 | 2.238024 |
| N | -7.69883 | -0.01609 | -0.51109 |
| C | -8.12743 | 1.335279 | -0.50082 |
| C | -8.92564 | 1.820656 | -1.54451 |
| C | -7.76155 | 2.181402 | 0.550487 |
| C | -9.37078 | 3.139273 | -1.5444  |
| H | -9.19376 | 1.14808  | -2.35587 |
| H | -7.14816 | 1.797324 | 1.363923 |
| C | -9.00094 | 3.982898 | -0.51    |
| H | -9.99347 | 3.500304 | -2.36267 |
| C | -8.61928 | -1.033   | -0.86924 |
| C | -9.91659 | -1.01588 | -0.348   |
| C | -8.23495 | -2.04801 | -1.75516 |
| H | -10.2115 | -0.22467 | 0.339283 |
| C | -9.12496 | -3.05751 | -2.10948 |
| C | -10.4119 | -3.04063 | -1.59773 |
| H | -8.80789 | -3.84183 | -2.7965  |
| C | -10.804  | -2.01447 | -0.72524 |
| C | -12.1972 | -2.24349 | -0.34486 |
| C | -11.5469 | -4.0148  | -1.8399  |
| C | -8.19161 | 3.501164 | 0.530063 |
| C | -7.96141 | 4.592183 | 1.476253 |
| C | -9.34951 | 5.441992 | -0.29734 |
| C | -8.63068 | 5.732009 | 1.005577 |
| C | -8.57486 | 6.920059 | 1.715222 |
| C | -7.2318  | 4.635572 | 2.659371 |
| C | -7.84402 | 6.964827 | 2.902107 |

---

---

|   |          |          |          |
|---|----------|----------|----------|
| H | -9.0926  | 7.808167 | 1.353382 |
| C | -7.17861 | 5.831778 | 3.368502 |
| H | -6.70992 | 3.752368 | 3.023928 |
| H | -7.7918  | 7.890973 | 3.469819 |
| H | -6.61227 | 5.884256 | 4.295428 |
| C | -12.6446 | -3.40733 | -0.9879  |
| C | -13.941  | -3.85754 | -0.80029 |
| C | -13.0457 | -1.5228  | 0.488757 |
| C | -14.7926 | -3.13635 | 0.036321 |
| H | -14.2925 | -4.76142 | -1.29761 |
| C | -14.3472 | -1.97951 | 0.67414  |
| H | -12.7003 | -0.61834 | 0.986831 |
| H | -15.8129 | -3.47849 | 0.193347 |
| H | -15.0244 | -1.42846 | 1.322583 |
| C | -8.81244 | 6.314773 | -1.43416 |
| H | -7.72983 | 6.188824 | -1.54725 |
| H | -9.29099 | 6.049066 | -2.38535 |
| H | -9.01645 | 7.37525  | -1.23911 |
| C | -10.8607 | 5.637012 | -0.1521  |
| H | -11.0977 | 6.686108 | 0.06624  |
| H | -11.3779 | 5.360484 | -1.07958 |
| H | -11.2592 | 5.019075 | 0.660389 |
| C | -11.183  | -5.42096 | -1.35775 |
| H | -10.3399 | -5.82134 | -1.93496 |
| H | -10.9003 | -5.41099 | -0.29911 |
| H | -12.0311 | -6.10627 | -1.48065 |
| C | -11.9461 | -4.05006 | -3.31684 |
| H | -11.1205 | -4.42928 | -3.93246 |
| H | -12.8104 | -4.70874 | -3.46953 |
| H | -12.2099 | -3.0488  | -3.67551 |
| C | 12.75074 | 2.04257  | -2.18992 |
| C | 14.1021  | 1.731073 | -1.98812 |
| C | 15.07032 | 2.390689 | -2.74472 |
| C | 14.65045 | 3.337617 | -3.67636 |
| C | 13.30015 | 3.634498 | -3.8657  |
| C | 12.32938 | 2.980938 | -3.11398 |
| C | 11.9162  | 1.232717 | -1.28385 |
| C | 12.84066 | 0.394163 | -0.49774 |
| C | 14.20108 | 0.693843 | -0.93858 |
| H | 16.12962 | 2.19006  | -2.6287  |
| H | 15.39911 | 3.856844 | -4.26927 |
| H | 13.01141 | 4.379435 | -4.6027  |
| H | 11.26762 | 3.184373 | -3.23013 |
| O | 10.69907 | 1.268072 | -1.21148 |

---



|   |          |          |          |
|---|----------|----------|----------|
| C | 15.38174 | 0.139257 | -0.498   |
| C | 16.65858 | 0.515859 | -1.01006 |
| N | 17.71608 | 0.800093 | -1.40569 |
| C | 15.46124 | -0.86896 | 0.507683 |
| N | 15.54641 | -1.69267 | 1.326771 |
| H | -7.22498 | -2.03564 | -2.15848 |
| C | -3.67265 | -1.02629 | 0.332689 |
| C | -3.99946 | 0.165614 | -0.32683 |
| C | -4.72992 | -1.86386 | 0.715686 |
| C | -5.31291 | 0.500001 | -0.60889 |
| H | -3.20809 | 0.849624 | -0.62968 |
| C | -6.04664 | -1.52625 | 0.459717 |
| H | -4.51396 | -2.8065  | 1.214221 |
| C | -6.36119 | -0.34202 | -0.21952 |
| H | -5.53748 | 1.423918 | -1.13615 |
| H | -6.84958 | -2.19049 | 0.770465 |
| C | -2.29091 | -1.40653 | 0.604602 |

**Table S4:** Cartesian coordinates of **MCPTD3**

| <b>Atom</b> | <b>X-axis</b> | <b>Y-axis</b> | <b>Z-axis</b> |
|-------------|---------------|---------------|---------------|
| C           | 6.652865      | -4.20884      | -0.06605      |
| C           | 5.348465      | -4.54589      | 0.229635      |
| C           | 4.328968      | -3.59265      | 0.138735      |
| C           | 4.646636      | -2.27462      | -0.28789      |
| C           | 5.993729      | -1.93155      | -0.61545      |
| C           | 7.007455      | -2.91316      | -0.47273      |
| C           | 2.972814      | -3.91603      | 0.441675      |
| C           | 3.605674      | -1.30448      | -0.39053      |
| C           | 2.265998      | -1.63703      | -0.0297       |
| C           | 1.988301      | -2.98594      | 0.361199      |
| C           | 1.258953      | -0.64338      | -0.10781      |
| C           | 1.592488      | 0.625364      | -0.60204      |
| C           | 2.883279      | 0.941105      | -0.97705      |
| C           | 3.909906      | -0.00148      | -0.86577      |
| C           | 5.252127      | 0.300514      | -1.23904      |
| C           | 6.245871      | -0.61615      | -1.12279      |
| H           | 7.249156      | -0.35389      | -1.44299      |
| H           | 5.465435      | 1.291735      | -1.63549      |
| H           | 2.740762      | -4.94058      | 0.727514      |
| H           | 7.439147      | -4.95006      | 0.057125      |
| H           | 5.103221      | -5.55496      | 0.555419      |
| H           | 0.959833      | -3.26459      | 0.570822      |
| H           | 0.815324      | 1.384945      | -0.65722      |
| H           | 3.117947      | 1.937694      | -1.34672      |

---

|   |          |          |          |
|---|----------|----------|----------|
| C | 12.10335 | -1.31981 | -0.64083 |
| H | 12.82826 | -1.99186 | -1.09664 |
| C | 10.80753 | -1.88802 | -0.7061  |
| C | 10.62069 | -3.13407 | -1.30606 |
| S | 9.270202 | -1.2679  | -0.12842 |
| C | 9.300777 | -3.57565 | -1.30446 |
| H | 11.45343 | -3.68316 | -1.73873 |
| C | 8.43033  | -2.6738  | -0.70992 |
| H | 8.96486  | -4.51038 | -1.74262 |
| C | -0.11824 | -0.89099 | 0.318405 |
| C | -0.59357 | -1.47622 | 1.46616  |
| S | -1.44994 | -0.32285 | -0.65907 |
| C | -2.00332 | -1.45943 | 1.572119 |
| H | 0.066241 | -1.86037 | 2.239141 |
| H | -2.543   | -1.84249 | 2.433443 |
| N | -8.20985 | -0.1156  | -0.35756 |
| C | -8.71281 | 1.161406 | -0.72268 |
| C | -9.59496 | 1.271502 | -1.80373 |
| C | -8.34115 | 2.299259 | -0.00126 |
| C | -10.1117 | 2.509399 | -2.17492 |
| H | -9.8687  | 0.370396 | -2.34812 |
| H | -7.66223 | 2.203824 | 0.844745 |
| C | -9.73463 | 3.641302 | -1.47111 |
| H | -10.7969 | 2.580461 | -3.01927 |
| C | -9.12874 | -1.18651 | -0.21709 |
| C | -10.3271 | -0.97986 | 0.472043 |
| C | -8.85477 | -2.4368  | -0.78627 |
| H | -10.531  | -0.00417 | 0.910579 |
| C | -9.76034 | -3.48657 | -0.65987 |
| C | -10.9519 | -3.28256 | 0.01702  |
| H | -9.53368 | -4.45432 | -1.10693 |
| C | -11.2322 | -2.0268  | 0.575636 |
| C | -12.5382 | -2.09509 | 1.228718 |
| C | -12.0832 | -4.25764 | 0.274389 |
| C | -8.84894 | 3.532407 | -0.38839 |
| C | -8.64434 | 4.867027 | 0.173447 |
| C | -10.1517 | 5.081485 | -1.69122 |
| C | -9.39966 | 5.781407 | -0.57621 |
| C | -9.3902  | 7.128434 | -0.25392 |
| C | -7.87677 | 5.295524 | 1.250953 |
| C | -8.62235 | 7.559204 | 0.827587 |
| H | -9.97489 | 7.842423 | -0.83372 |
| C | -7.8731  | 6.649425 | 1.572555 |
| H | -7.29019 | 4.587194 | 1.833516 |

---

---

|   |          |          |          |
|---|----------|----------|----------|
| H | -8.60734 | 8.613555 | 1.093647 |
| H | -7.28012 | 7.002025 | 2.413201 |
| C | -13.0472 | -3.39161 | 1.062559 |
| C | -14.2817 | -3.73242 | 1.59029  |
| C | -13.2611 | -1.13182 | 1.923821 |
| C | -15.0076 | -2.76777 | 2.288769 |
| H | -14.6818 | -4.73819 | 1.462957 |
| C | -14.5004 | -1.47941 | 2.452794 |
| H | -12.8659 | -0.12562 | 2.053022 |
| H | -15.978  | -3.02119 | 2.709421 |
| H | -15.0798 | -0.73947 | 3.000044 |
| C | -9.69995 | 5.5851   | -3.06418 |
| H | -8.6175  | 5.467522 | -3.18764 |
| H | -10.2001 | 5.026845 | -3.86572 |
| H | -9.94618 | 6.647182 | -3.18827 |
| C | -11.6643 | 5.253011 | -1.53759 |
| H | -11.9476 | 6.308674 | -1.63497 |
| H | -12.1981 | 4.688479 | -2.31261 |
| H | -12.0025 | 4.895902 | -0.55841 |
| C | -11.6087 | -5.45469 | 1.101585 |
| H | -10.8607 | -6.03626 | 0.547794 |
| H | -11.1581 | -5.12549 | 2.04471  |
| H | -12.4478 | -6.12162 | 1.336753 |
| C | -12.7125 | -4.73849 | -1.03528 |
| H | -11.986  | -5.31033 | -1.6266  |
| H | -13.5729 | -5.39    | -0.8366  |
| H | -13.0562 | -3.89129 | -1.63935 |
| C | 12.76814 | 1.954474 | 0.929866 |
| C | 14.06103 | 1.592856 | 0.53419  |
| C | 15.12611 | 2.450059 | 0.815879 |
| C | 14.84363 | 3.630416 | 1.481366 |
| C | 13.5438  | 3.974945 | 1.869013 |
| C | 12.48251 | 3.133613 | 1.595303 |
| C | 11.81561 | 0.900883 | 0.535207 |
| C | 12.60564 | -0.1488  | -0.1321  |
| C | 14.00161 | 0.280178 | -0.143   |
| H | 16.1579  | 2.248446 | 0.54811  |
| H | 11.46859 | 3.387913 | 1.891332 |
| O | 10.61322 | 0.921945 | 0.737059 |
| C | 15.09342 | -0.37029 | -0.67133 |
| C | 16.4139  | 0.165344 | -0.61798 |
| N | 17.5004  | 0.582579 | -0.58691 |
| C | 15.02648 | -1.63602 | -1.32464 |
| N | 14.99184 | -2.66942 | -1.86064 |

---

|   |          |          |          |
|---|----------|----------|----------|
| H | -7.9232  | -2.5754  | -1.33013 |
| F | 15.8232  | 4.475652 | 1.768996 |
| F | 13.35803 | 5.123794 | 2.502147 |
| C | -4.05809 | -0.67206 | 0.273581 |
| C | -4.53782 | 0.282952 | -0.63239 |
| C | -5.00787 | -1.44219 | 0.959182 |
| C | -5.89225 | 0.458673 | -0.85137 |
| H | -3.8336  | 0.907983 | -1.17964 |
| C | -6.36526 | -1.25667 | 0.767189 |
| H | -4.67461 | -2.2071  | 1.657559 |
| C | -6.83415 | -0.30445 | -0.14895 |
| H | -6.23307 | 1.200106 | -1.56952 |
| H | -7.07754 | -1.85927 | 1.32519  |
| C | -2.63182 | -0.86334 | 0.505597 |

**Table S5:** Cartesian coordinates of MCPTD4

| Atom | X-axis   | Y-axis   | Z-axis   |
|------|----------|----------|----------|
| C    | 6.472233 | -4.34735 | -0.07316 |
| C    | 5.16507  | -4.67695 | 0.217671 |
| C    | 4.150444 | -3.71907 | 0.118904 |
| C    | 4.476057 | -2.40476 | -0.31304 |
| C    | 5.825943 | -2.06984 | -0.63821 |
| C    | 6.835277 | -3.05505 | -0.48411 |
| C    | 2.792039 | -4.03405 | 0.420097 |
| C    | 3.440392 | -1.42958 | -0.42152 |
| C    | 2.098547 | -1.75277 | -0.05991 |
| C    | 1.812737 | -3.09869 | 0.335004 |
| C    | 1.097658 | -0.75295 | -0.14056 |
| C    | 1.439031 | 0.511786 | -0.63997 |
| C    | 2.731398 | 0.817869 | -1.017   |
| C    | 3.752288 | -0.13045 | -0.90186 |
| C    | 5.096008 | 0.16214  | -1.27611 |
| C    | 6.084861 | -0.75907 | -1.15368 |
| H    | 7.089148 | -0.50312 | -1.47534 |
| H    | 5.315165 | 1.149935 | -1.67776 |
| H    | 2.553929 | -5.05627 | 0.709209 |
| H    | 7.25408  | -5.09168 | 0.059078 |
| H    | 4.913773 | -5.68323 | 0.547422 |
| H    | 0.782393 | -3.37085 | 0.544125 |
| H    | 0.667075 | 1.276468 | -0.69695 |
| H    | 2.972225 | 1.811599 | -1.39031 |
| C    | 11.92916 | -1.45795 | -0.63365 |
| H    | 12.65865 | -2.13893 | -1.06814 |
| C    | 10.63687 | -2.03169 | -0.69311 |

---

|   |          |          |          |
|---|----------|----------|----------|
| C | 10.45822 | -3.29161 | -1.26875 |
| S | 9.091802 | -1.40304 | -0.14562 |
| C | 9.139762 | -3.73465 | -1.2736  |
| H | 11.29661 | -3.8484  | -1.68025 |
| C | 8.260494 | -2.82099 | -0.70826 |
| H | 8.810601 | -4.67841 | -1.69717 |
| C | -0.28002 | -0.98854 | 0.290231 |
| C | -0.75667 | -1.5686  | 1.440188 |
| S | -1.60991 | -0.40468 | -0.68056 |
| C | -2.16552 | -1.53511 | 1.553155 |
| H | -0.09774 | -1.9598  | 2.210366 |
| H | -2.70493 | -1.91175 | 2.41746  |
| N | -8.36399 | -0.10852 | -0.34633 |
| C | -8.84999 | 1.172013 | -0.72204 |
| C | -9.73185 | 1.285321 | -1.803   |
| C | -8.46028 | 2.310865 | -0.01176 |
| C | -10.23   | 2.527434 | -2.18545 |
| H | -10.0198 | 0.383583 | -2.33893 |
| H | -7.78155 | 2.213043 | 0.83413  |
| C | -9.83456 | 3.660131 | -1.4931  |
| H | -10.9149 | 2.600939 | -3.02984 |
| C | -9.29581 | -1.16741 | -0.20023 |
| C | -10.4911 | -0.94325 | 0.488857 |
| C | -9.03715 | -2.42342 | -0.76391 |
| H | -10.6831 | 0.036724 | 0.923166 |
| C | -9.95466 | -3.46202 | -0.63168 |
| C | -11.1429 | -3.24076 | 0.04541  |
| H | -9.73992 | -4.43445 | -1.07442 |
| C | -11.4083 | -1.97901 | 0.597927 |
| C | -12.7152 | -2.02832 | 1.251017 |
| C | -12.2853 | -4.20133 | 0.30859  |
| C | -8.94946 | 3.547891 | -0.41019 |
| C | -8.72303 | 4.884537 | 0.138222 |
| C | -10.2282 | 5.104599 | -1.72758 |
| C | -9.46453 | 5.80338  | -0.61973 |
| C | -9.43341 | 7.153193 | -0.31084 |
| C | -7.94734 | 5.311503 | 1.210505 |
| C | -8.65749 | 7.582451 | 0.765514 |
| H | -10.0075 | 7.870513 | -0.89709 |
| C | -7.92172 | 6.668323 | 1.518539 |
| H | -7.37128 | 4.599815 | 1.799431 |
| H | -8.62567 | 8.638987 | 1.021206 |
| H | -7.3221  | 7.0198   | 2.354937 |
| C | -13.2392 | -3.31966 | 1.091698 |

---

---

|   |          |          |          |
|---|----------|----------|----------|
| C | -14.4783 | -3.64301 | 1.619765 |
| C | -13.4279 | -1.05258 | 1.939241 |
| C | -15.194  | -2.66582 | 2.311148 |
| H | -14.8898 | -4.64479 | 1.497485 |
| C | -14.6721 | -1.38246 | 2.468207 |
| H | -13.0214 | -0.05019 | 2.06287  |
| H | -16.168  | -2.90523 | 2.731624 |
| H | -15.2437 | -0.63236 | 3.009785 |
| C | -9.7682  | 5.587031 | -3.10545 |
| H | -8.68767 | 5.451392 | -3.22722 |
| H | -10.2766 | 5.02857  | -3.90158 |
| H | -9.9977  | 6.651544 | -3.2405  |
| C | -11.7378 | 5.302619 | -1.57598 |
| H | -12.0035 | 6.361835 | -1.68364 |
| H | -12.2807 | 4.739523 | -2.34567 |
| H | -12.082  | 4.960648 | -0.59351 |
| C | -11.8244 | -5.39876 | 1.142808 |
| H | -11.0837 | -5.99239 | 0.592038 |
| H | -11.3693 | -5.06913 | 2.083629 |
| H | -12.6711 | -6.05434 | 1.382572 |
| C | -12.9206 | -4.68256 | -0.99802 |
| H | -12.2009 | -5.26577 | -1.58653 |
| H | -13.7882 | -5.32334 | -0.7952  |
| H | -13.2553 | -3.83497 | -1.60662 |
| C | 12.57053 | 1.867994 | 0.826562 |
| C | 13.87097 | 1.505933 | 0.442933 |
| C | 14.93761 | 2.369346 | 0.678682 |
| C | 14.66132 | 3.580413 | 1.29593  |
| C | 13.37307 | 3.949297 | 1.679469 |
| C | 12.3146  | 3.078794 | 1.441495 |
| C | 11.62471 | 0.791636 | 0.476863 |
| C | 12.4278  | -0.27047 | -0.15626 |
| C | 13.81785 | 0.164751 | -0.18215 |
| H | 15.96659 | 2.155031 | 0.41229  |
| O | 10.42417 | 0.794575 | 0.678956 |
| C | 14.91572 | -0.49943 | -0.68166 |
| C | 16.23454 | 0.041435 | -0.65246 |
| N | 17.32091 | 0.460169 | -0.64208 |
| C | 14.85595 | -1.79183 | -1.28121 |
| N | 14.82799 | -2.84669 | -1.77407 |
| H | -8.1077  | -2.57531 | -1.30785 |
| F | 15.64156 | 4.435788 | 1.540501 |
| F | 13.16225 | 5.115788 | 2.262666 |
| C | -4.21707 | -0.72099 | 0.265202 |

---

|   |          |          |          |
|---|----------|----------|----------|
| C | -4.68809 | 0.234901 | -0.64443 |
| C | -5.17408 | -1.47223 | 0.961628 |
| C | -6.04105 | 0.428935 | -0.85711 |
| H | -3.97809 | 0.845948 | -1.19995 |
| C | -6.52966 | -1.26811 | 0.775968 |
| H | -4.84825 | -2.23697 | 1.66367  |
| C | -6.98989 | -0.31552 | -0.14425 |
| H | -6.37505 | 1.170509 | -1.57834 |
| H | -7.24759 | -1.85629 | 1.342076 |
| C | -2.79233 | -0.93117 | 0.489964 |
| F | 11.09898 | 3.433281 | 1.808415 |

**Table S6:** Cartesian coordinates of MCPTD5

| Atom | X-axis   | Y-axis   | Z-axis   |
|------|----------|----------|----------|
| C    | -6.12326 | -4.55365 | 0.020523 |
| C    | -4.80896 | -4.84749 | -0.27616 |
| C    | -3.8175  | -3.86696 | -0.16561 |
| C    | -4.17443 | -2.56677 | 0.283087 |
| C    | -5.53164 | -2.26895 | 0.61501  |
| C    | -6.51718 | -3.27667 | 0.450624 |
| C    | -2.45234 | -4.14581 | -0.47159 |
| C    | -3.16197 | -1.56833 | 0.401976 |
| C    | -1.81313 | -1.85477 | 0.034921 |
| C    | -1.49539 | -3.1886  | -0.37638 |
| C    | -0.8363  | -0.83222 | 0.126507 |
| C    | -1.20676 | 0.417327 | 0.642652 |
| C    | -2.50569 | 0.687539 | 1.024674 |
| C    | -3.50394 | -0.2833  | 0.89866  |
| C    | -4.85356 | -0.02796 | 1.278704 |
| C    | -5.82037 | -0.97115 | 1.147391 |
| H    | -6.82919 | -0.74314 | 1.47558  |
| H    | -5.09551 | 0.949084 | 1.693422 |
| H    | -2.19061 | -5.15864 | -0.77305 |
| H    | -6.88694 | -5.31504 | -0.12048 |
| H    | -4.53393 | -5.84287 | -0.61977 |
| H    | -0.45901 | -3.43353 | -0.58965 |
| H    | -0.45267 | 1.198929 | 0.70886  |
| H    | -2.76976 | 1.670292 | 1.411143 |
| C    | -11.6475 | -1.80797 | 0.673229 |
| H    | -12.3593 | -2.51491 | 1.095754 |
| C    | -10.3422 | -2.35375 | 0.707784 |
| C    | -10.1273 | -3.61948 | 1.256514 |
| S    | -8.81874 | -1.67564 | 0.15943  |
| C    | -8.79784 | -4.02863 | 1.24227  |

---

|   |          |          |          |
|---|----------|----------|----------|
| H | -10.9477 | -4.20522 | 1.66372  |
| C | -7.94648 | -3.08278 | 0.687035 |
| H | -8.44196 | -4.97116 | 1.646474 |
| C | 0.544949 | -1.03115 | -0.31101 |
| C | 1.028828 | -1.58258 | -1.47196 |
| S | 1.866383 | -0.43926 | 0.666411 |
| C | 2.43645  | -1.52215 | -1.58739 |
| H | 0.374585 | -1.97335 | -2.24637 |
| H | 2.980563 | -1.8745  | -2.45895 |
| N | 8.617616 | -0.05332 | 0.331456 |
| C | 9.093646 | 1.224401 | 0.727915 |
| C | 9.981481 | 1.326592 | 1.805182 |
| C | 8.687893 | 2.372611 | 0.041863 |
| C | 10.46906 | 2.56644  | 2.208101 |
| H | 10.28219 | 0.418263 | 2.322598 |
| H | 8.005164 | 2.283989 | -0.8018  |
| C | 10.05677 | 3.708049 | 1.540773 |
| H | 11.15832 | 2.631073 | 3.049641 |
| C | 9.55612  | -1.10472 | 0.172068 |
| C | 10.74574 | -0.86814 | -0.52235 |
| C | 9.30729  | -2.3665  | 0.726966 |
| H | 10.92975 | 0.116327 | -0.94992 |
| C | 10.22922 | -3.39927 | 0.580777 |
| C | 11.41198 | -3.16596 | -0.10186 |
| H | 10.02246 | -4.37647 | 1.016769 |
| C | 11.66758 | -1.89833 | -0.64567 |
| C | 12.97087 | -1.93554 | -1.30684 |
| C | 12.55783 | -4.11827 | -0.3793  |
| C | 9.166176 | 3.606929 | 0.461275 |
| C | 8.921125 | 4.951351 | -0.05919 |
| C | 10.43496 | 5.151998 | 1.801727 |
| C | 9.656376 | 5.863663 | 0.712583 |
| C | 9.607641 | 7.218845 | 0.430981 |
| C | 8.134111 | 5.390411 | -1.11828 |
| C | 8.820226 | 7.660334 | -0.63202 |
| H | 10.17718 | 7.93074  | 1.028158 |
| C | 8.090736 | 6.752695 | -1.39892 |
| H | 7.562807 | 4.683917 | -1.71801 |
| H | 8.774512 | 8.721304 | -0.86635 |
| H | 7.481973 | 7.113746 | -2.22456 |
| C | 13.50235 | -3.22538 | -1.16085 |
| C | 14.74044 | -3.53788 | -1.69768 |
| C | 13.67508 | -0.95057 | -1.9907  |
| C | 15.4477  | -2.55138 | -2.38443 |

---



---

|   |          |          |          |
|---|----------|----------|----------|
| H | 15.15778 | -4.53842 | -1.58531 |
| C | 14.91843 | -1.26955 | -2.52854 |
| H | 13.26286 | 0.050721 | -2.10405 |
| H | 16.42089 | -2.78217 | -2.81149 |
| H | 15.48333 | -0.51199 | -3.0667  |
| C | 9.97807  | 5.60146  | 3.19177  |
| H | 8.899756 | 5.451837 | 3.316945 |
| H | 10.49701 | 5.032545 | 3.973596 |
| H | 10.19704 | 6.665448 | 3.347166 |
| C | 11.94113 | 5.371336 | 1.644937 |
| H | 12.19474 | 6.431291 | 1.772857 |
| H | 12.49577 | 4.799175 | 2.399418 |
| H | 12.28322 | 5.053961 | 0.653496 |
| C | 12.09874 | -5.31192 | -1.21981 |
| H | 11.36491 | -5.914   | -0.66909 |
| H | 11.63613 | -4.97782 | -2.15537 |
| H | 12.94781 | -5.96073 | -1.46953 |
| C | 13.20364 | -4.60562 | 0.919943 |
| H | 12.49084 | -5.19734 | 1.508355 |
| H | 14.07367 | -5.2398  | 0.707214 |
| H | 13.53704 | -3.76066 | 1.532866 |
| C | -12.3668 | 1.556303 | -0.66565 |
| C | -13.651  | 1.155624 | -0.28087 |
| C | -14.7169 | 2.029523 | -0.47522 |
| C | -14.4644 | 3.277042 | -1.04578 |
| C | -13.1679 | 3.659977 | -1.42409 |
| C | -12.1038 | 2.785735 | -1.23194 |
| C | -11.4    | 0.48259  | -0.36971 |
| C | -12.1718 | -0.61749 | 0.233062 |
| C | -13.5724 | -0.2087  | 0.287188 |
| H | -15.7392 | 1.787416 | -0.2039  |
| O | -10.2019 | 0.528288 | -0.59205 |
| C | -14.6536 | -0.91427 | 0.763995 |
| C | -15.9802 | -0.39166 | 0.76495  |
| N | -17.0721 | 0.012107 | 0.778299 |
| C | -14.568  | -2.23081 | 1.305406 |
| N | -14.5179 | -3.30557 | 1.751244 |
| H | 8.381386 | -2.52727 | 1.27445  |
| C | 4.477186 | -0.70014 | -0.28853 |
| C | 4.937723 | 0.247427 | 0.635043 |
| C | 5.442237 | -1.42954 | -0.99692 |
| C | 6.288682 | 0.453475 | 0.850213 |
| H | 4.221188 | 0.841918 | 1.200111 |
| C | 6.795438 | -1.21294 | -0.80868 |

---

|   |             |          |          |
|---|-------------|----------|----------|
| H | 5.124722    | -2.18755 | -1.70995 |
| C | 7.245399    | -0.26963 | 0.126058 |
| H | 6.6148      | 1.187807 | 1.582437 |
| H | 7.519761    | -1.78465 | -1.38344 |
| C | 3.055127    | -0.92622 | -0.51495 |
| H | -11.0913    | 3.058889 | -1.51704 |
| C | - 12.863200 | 5.208994 | -2.13008 |
| C | -15.797993  | 4.354726 | -1.27775 |

**Table S7:** Cartesian coordinates of MCPTD6

| Atom | X-axis   | Y-axis   | Z-axis   |
|------|----------|----------|----------|
| C    | -5.7301  | -4.603   | -0.12352 |
| C    | -4.41442 | -4.8671  | -0.44041 |
| C    | -3.44136 | -3.86801 | -0.3314  |
| C    | -3.81987 | -2.57747 | 0.126933 |
| C    | -5.17973 | -2.30779 | 0.472341 |
| C    | -6.14457 | -3.33758 | 0.321531 |
| C    | -2.07308 | -4.12056 | -0.64575 |
| C    | -2.82467 | -1.56161 | 0.247044 |
| C    | -1.47145 | -1.82362 | -0.12169 |
| C    | -1.13206 | -3.14834 | -0.54462 |
| C    | -0.51035 | -0.7875  | -0.01842 |
| C    | -0.90076 | 0.452973 | 0.504147 |
| C    | -2.20516 | 0.701059 | 0.883087 |
| C    | -3.18744 | -0.28532 | 0.751025 |
| C    | -4.54059 | -0.05493 | 1.134457 |
| C    | -5.49012 | -1.01607 | 1.007074 |
| H    | -6.50134 | -0.80632 | 1.339772 |
| H    | -4.79955 | 0.917242 | 1.550323 |
| H    | -1.79531 | -5.12629 | -0.95643 |
| H    | -6.4795  | -5.37998 | -0.25583 |
| H    | -4.12296 | -5.85419 | -0.79421 |
| H    | -0.09219 | -3.37392 | -0.76222 |
| H    | -0.15753 | 1.244173 | 0.579035 |
| H    | -2.48585 | 1.677206 | 1.274533 |
| C    | -11.3036 | -2.0268  | 0.787124 |
| H    | -11.961  | -2.75811 | 1.252717 |
| C    | -9.98328 | -2.53101 | 0.740338 |
| C    | -9.70326 | -3.78929 | 1.278211 |
| S    | -8.50984 | -1.80859 | 0.116922 |
| C    | -8.36482 | -4.15742 | 1.200464 |
| H    | -10.4846 | -4.39711 | 1.728138 |
| C    | -7.5701  | -3.18555 | 0.606193 |
| H    | -7.96107 | -5.08642 | 1.590528 |

---

|   |          |          |          |
|---|----------|----------|----------|
| C | 0.877088 | -0.96752 | -0.44525 |
| C | 1.377176 | -1.49506 | -1.61025 |
| S | 2.183574 | -0.39463 | 0.562596 |
| C | 2.786422 | -1.43231 | -1.70409 |
| H | 0.733936 | -1.87201 | -2.40069 |
| H | 3.344406 | -1.76713 | -2.57384 |
| N | 8.942215 | -0.05035 | 0.351589 |
| C | 9.425792 | 1.221199 | 0.758973 |
| C | 10.29235 | 1.311688 | 1.854365 |
| C | 9.049547 | 2.374518 | 0.064717 |
| C | 10.78881 | 2.544915 | 2.266675 |
| H | 10.57017 | 0.39961  | 2.37794  |
| H | 8.383333 | 2.294863 | -0.79289 |
| C | 10.40665 | 3.691565 | 1.59014  |
| H | 11.46136 | 2.600212 | 3.122251 |
| C | 9.871683 | -1.11162 | 0.2061   |
| C | 11.07974 | -0.88409 | -0.459   |
| C | 9.596566 | -2.37449 | 0.746299 |
| H | 11.2845  | 0.101035 | -0.87543 |
| C | 10.51031 | -3.41633 | 0.613966 |
| C | 11.7113  | -3.19187 | -0.03932 |
| H | 10.28234 | -4.39394 | 1.038298 |
| C | 11.99318 | -1.92334 | -0.5677  |
| C | 13.31126 | -1.96999 | -1.19786 |
| C | 12.85326 | -4.15458 | -0.2966  |
| C | 9.536564 | 3.602388 | 0.49304  |
| C | 9.322241 | 4.949719 | -0.03342 |
| C | 10.80164 | 5.129942 | 1.85705  |
| C | 10.05622 | 5.851759 | 0.751542 |
| C | 10.03434 | 7.207052 | 0.467084 |
| C | 8.563159 | 5.399211 | -1.10843 |
| C | 9.275247 | 7.658909 | -0.61202 |
| H | 10.60302 | 7.91105  | 1.074338 |
| C | 8.546781 | 6.761499 | -1.39189 |
| H | 7.992532 | 4.700718 | -1.71811 |
| H | 9.250775 | 8.720035 | -0.84883 |
| H | 7.960104 | 7.13061  | -2.22985 |
| C | 13.82642 | -3.26597 | -1.0476  |
| C | 15.07338 | -3.58765 | -1.55791 |
| C | 14.04023 | -0.9881  | -1.85974 |
| C | 15.80558 | -2.60418 | -2.22267 |
| H | 15.47807 | -4.59302 | -1.44254 |
| C | 15.29212 | -1.31642 | -2.3712  |
| H | 13.6402  | 0.017673 | -1.97676 |

---

---

|   |          |          |          |
|---|----------|----------|----------|
| H | 16.78584 | -2.84222 | -2.62909 |
| H | 15.87634 | -0.5617  | -2.89247 |
| C | 10.32377 | 5.588228 | 3.237123 |
| H | 9.24114  | 5.454602 | 3.341192 |
| H | 10.81886 | 5.012851 | 4.029623 |
| H | 10.55539 | 6.649063 | 3.395627 |
| C | 12.31393 | 5.32555  | 1.730926 |
| H | 12.5815  | 6.381611 | 1.862432 |
| H | 12.84399 | 4.746292 | 2.497579 |
| H | 12.67144 | 5.001015 | 0.747269 |
| C | 12.40179 | -5.33539 | -1.15914 |
| H | 11.64636 | -5.93267 | -0.63297 |
| H | 11.96781 | -4.98746 | -2.10335 |
| H | 13.24906 | -5.99256 | -1.3925  |
| C | 13.4606  | -4.66071 | 1.013878 |
| H | 12.72618 | -5.24872 | 1.578963 |
| H | 14.32801 | -5.30357 | 0.817364 |
| H | 13.78857 | -3.82516 | 1.642408 |
| C | -12.2429 | 1.304647 | -0.51723 |
| C | -13.4752 | 0.853349 | -0.02018 |
| C | -14.6006 | 1.661106 | -0.11224 |
| C | -14.4741 | 2.913042 | -0.70786 |
| C | -13.2503 | 3.372494 | -1.21515 |
| C | -12.1163 | 2.549776 | -1.11413 |
| C | -11.2146 | 0.260792 | -0.27847 |
| C | -11.9034 | -0.8567  | 0.389015 |
| C | -13.3037 | -0.50153 | 0.550035 |
| H | -15.5748 | 1.363401 | 0.258986 |
| O | -10.0356 | 0.316181 | -0.5749  |
| C | -14.3165 | -1.24179 | 1.118732 |
| C | -15.6628 | -0.78453 | 1.223097 |
| N | -16.7709 | -0.44168 | 1.324619 |
| C | -14.1327 | -2.5461  | 1.665675 |
| N | -14.0045 | -3.61177 | 2.117774 |
| H | 8.657053 | -2.52933 | 1.27182  |
| C | 4.808565 | -0.64571 | -0.35651 |
| C | 5.260587 | 0.293251 | 0.579862 |
| C | 5.779246 | -1.38272 | -1.04899 |
| C | 6.6093   | 0.483187 | 0.82295  |
| H | 4.539221 | 0.893491 | 1.132585 |
| C | 7.130732 | -1.1823  | -0.83253 |
| H | 5.467056 | -2.13468 | -1.77072 |
| C | 7.572091 | -0.24863 | 0.115822 |
| H | 6.929067 | 1.210857 | 1.56462  |

---

|   |            |          |          |
|---|------------|----------|----------|
| H | 7.860202   | -1.76016 | -1.39448 |
| C | 3.389124   | -0.85929 | -0.61039 |
| C | -13.139994 | 4.92386  | -1.95014 |
| C | -15.885648 | 3.9068   | -0.80712 |
| C | -10.597326 | 3.088861 | -1.72373 |

**Table S8:** Cartesian coordinates of MCPTD7

| Atom | X-axis   | Y-axis   | Z-axis   |
|------|----------|----------|----------|
| C    | 6.358431 | -4.43185 | -0.00862 |
| C    | 5.047294 | -4.73741 | 0.285814 |
| C    | 4.0485   | -3.76267 | 0.183334 |
| C    | 4.395786 | -2.45556 | -0.25344 |
| C    | 5.751039 | -2.14368 | -0.58083 |
| C    | 6.744196 | -3.14674 | -0.42533 |
| C    | 2.685896 | -4.05574 | 0.484616 |
| C    | 3.375315 | -1.46489 | -0.36564 |
| C    | 2.028194 | -1.76607 | -0.00449 |
| C    | 1.721027 | -3.10562 | 0.394399 |
| C    | 1.041956 | -0.75183 | -0.09084 |
| C    | 1.40273  | 0.505253 | -0.59624 |
| C    | 2.700183 | 0.790147 | -0.97186 |
| C    | 3.706901 | -0.17294 | -0.85092 |
| C    | 5.05439  | 0.096819 | -1.2264  |
| C    | 6.02927  | -0.83958 | -1.10168 |
| H    | 7.035602 | -0.59969 | -1.42886 |
| H    | 5.288916 | 1.079041 | -1.63301 |
| H    | 2.431984 | -5.07317 | 0.776804 |
| H    | 7.126321 | -5.18969 | 0.127584 |
| H    | 4.779465 | -5.73753 | 0.620887 |
| H    | 0.686246 | -3.36144 | 0.6022   |
| H    | 0.641948 | 1.280554 | -0.65882 |
| H    | 2.956398 | 1.778361 | -1.34949 |
| C    | 11.8632  | -1.65473 | -0.625   |
| H    | 12.58169 | -2.36346 | -1.03278 |
| C    | 10.56413 | -2.20179 | -0.66615 |
| C    | 10.35855 | -3.47806 | -1.20122 |
| S    | 9.031307 | -1.52418 | -0.13846 |
| C    | 9.03414  | -3.89278 | -1.19107 |
| H    | 11.18512 | -4.06485 | -1.59435 |
| C    | 8.171322 | -2.94316 | -0.65274 |
| H    | 8.686062 | -4.84123 | -1.58755 |
| C    | -0.33888 | -0.96759 | 0.338333 |
| C    | -0.82328 | -1.53692 | 1.490636 |
| S    | -1.66096 | -0.37716 | -0.6392  |

---

|   |          |          |          |
|---|----------|----------|----------|
| C | -2.23178 | -1.49164 | 1.599255 |
| H | -0.16958 | -1.92915 | 2.264788 |
| H | -2.77746 | -1.85902 | 2.463562 |
| N | -8.41616 | -0.07413 | -0.34538 |
| C | -8.90517 | 1.203012 | -0.72973 |
| C | -9.77923 | 1.307549 | -1.81769 |
| C | -8.52769 | 2.346146 | -0.01973 |
| C | -10.2817 | 2.545574 | -2.20776 |
| H | -10.058  | 0.402465 | -2.35286 |
| H | -7.85565 | 2.255008 | 0.832212 |
| C | -9.89841 | 3.682598 | -1.51576 |
| H | -10.9605 | 2.612383 | -3.05755 |
| C | -9.34641 | -1.13527 | -0.20042 |
| C | -10.541  | -0.91421 | 0.49054  |
| C | -9.08636 | -2.38915 | -0.7678  |
| H | -10.7337 | 0.064713 | 0.926952 |
| C | -10.0021 | -3.42953 | -0.63693 |
| C | -11.1897 | -3.21162 | 0.042473 |
| H | -9.78667 | -4.4006  | -1.0823  |
| C | -11.4565 | -1.95169 | 0.598556 |
| C | -12.7622 | -2.00502 | 1.253667 |
| C | -12.3299 | -4.17487 | 0.305091 |
| C | -9.02105 | 3.579107 | -0.42568 |
| C | -8.80731 | 4.918716 | 0.12049  |
| C | -10.2995 | 5.123821 | -1.75737 |
| C | -9.54875 | 5.830606 | -0.64584 |
| C | -9.52866 | 7.181456 | -0.34058 |
| C | -8.04278 | 5.353593 | 1.197624 |
| C | -8.76398 | 7.618634 | 0.740588 |
| H | -10.1028 | 7.893417 | -0.93326 |
| C | -8.0283  | 6.711367 | 1.502025 |
| H | -7.46679 | 4.647285 | 1.793076 |
| H | -8.74086 | 8.676044 | 0.993548 |
| H | -7.43756 | 7.06908  | 2.342064 |
| C | -13.284  | -3.29697 | 1.092137 |
| C | -14.5214 | -3.62401 | 1.62178  |
| C | -13.4753 | -1.0323  | 1.945676 |
| C | -15.2376 | -2.64989 | 2.317011 |
| H | -14.9313 | -4.62624 | 1.497873 |
| C | -14.7179 | -1.36591 | 2.476245 |
| H | -13.0705 | -0.02945 | 2.071006 |
| H | -16.2102 | -2.89223 | 2.738816 |
| H | -15.2898 | -0.6183  | 3.020808 |
| C | -9.83268 | 5.60513  | -3.1333  |

---

---

|   |          |          |          |
|---|----------|----------|----------|
| H | -8.75048 | 5.47601  | -3.24706 |
| H | -10.332  | 5.04119  | -3.93133 |
| H | -10.068  | 6.667734 | -3.27312 |
| C | -11.8115 | 5.312315 | -1.61749 |
| H | -12.0833 | 6.369444 | -1.73014 |
| H | -12.3451 | 4.743604 | -2.38957 |
| H | -12.1609 | 4.970911 | -0.63662 |
| C | -11.8653 | -5.37367 | 1.135322 |
| H | -11.1247 | -5.96471 | 0.581618 |
| H | -11.409  | -5.04577 | 2.076175 |
| H | -12.7104 | -6.03125 | 1.374981 |
| C | -12.9665 | -4.65384 | -1.00172 |
| H | -12.2469 | -5.23454 | -1.59282 |
| H | -13.8327 | -5.29644 | -0.79901 |
| H | -13.3035 | -3.80532 | -1.60771 |
| C | 12.56774 | 1.72445  | 0.697672 |
| C | 13.85701 | 1.320466 | 0.333574 |
| C | 14.92281 | 2.192509 | 0.537864 |
| C | 14.66409 | 3.447882 | 1.098942 |
| C | 13.35409 | 3.837513 | 1.457207 |
| C | 12.2914  | 2.956321 | 1.252215 |
| C | 11.60364 | 0.644073 | 0.393144 |
| C | 12.38312 | -0.45576 | -0.1887  |
| C | 13.78185 | -0.05023 | -0.22869 |
| H | 15.94731 | 1.943191 | 0.281519 |
| O | 10.40369 | 0.699368 | 0.600657 |
| C | 14.8714  | -0.75495 | -0.68699 |
| C | 16.19761 | -0.23165 | -0.67368 |
| N | 17.28864 | 0.174401 | -0.6743  |
| C | 14.79247 | -2.07421 | -1.22308 |
| N | 14.74502 | -3.15102 | -1.66381 |
| H | -8.15729 | -2.538   | -1.3133  |
| C | -4.27349 | -0.67729 | 0.297088 |
| C | -4.73934 | 0.282674 | -0.61089 |
| C | -5.23406 | -1.43407 | 0.982517 |
| C | -6.091   | 0.474982 | -0.83293 |
| H | -4.02641 | 0.898456 | -1.15742 |
| C | -6.58845 | -1.23261 | 0.786975 |
| H | -4.91176 | -2.20215 | 1.682524 |
| C | -7.04392 | -0.2764  | -0.13227 |
| H | -6.42098 | 1.219693 | -1.55271 |
| H | -7.30921 | -1.82588 | 1.344004 |
| C | -2.8506  | -0.88957 | 0.53008  |
| H | 11.27227 | 3.225011 | 1.518126 |

---

|   |          |          |          |
|---|----------|----------|----------|
| C | 13.10917 | 5.126245 | 2.025874 |
| N | 12.88515 | 6.168502 | 2.488197 |
| C | 15.75531 | 4.349164 | 1.310069 |
| N | 16.64677 | 5.075044 | 1.478135 |

**Table S9:** Cartesian coordinates of MCPTD8

| Atom | X-axis   | Y-axis   | Z-axis   |
|------|----------|----------|----------|
| C    | -6.20941 | -4.35579 | -0.25549 |
| C    | -4.89625 | -4.62648 | -0.57923 |
| C    | -3.91673 | -3.6346  | -0.46834 |
| C    | -4.28574 | -2.34427 | -0.00187 |
| C    | -5.64264 | -2.06856 | 0.350198 |
| C    | -6.61399 | -3.09132 | 0.199536 |
| C    | -2.55085 | -3.89366 | -0.78908 |
| C    | -3.28392 | -1.33527 | 0.120796 |
| C    | -1.93307 | -1.60424 | -0.25198 |
| C    | -1.6033  | -2.92845 | -0.68508 |
| C    | -0.96492 | -0.57582 | -0.14225 |
| C    | -1.34579 | 0.664475 | 0.386858 |
| C    | -2.64843 | 0.919939 | 0.767875 |
| C    | -3.63737 | -0.05911 | 0.632352 |
| C    | -4.98881 | 0.178073 | 1.019562 |
| C    | -5.94424 | -0.77669 | 0.890607 |
| H    | -6.95438 | -0.56305 | 1.22456  |
| H    | -5.24054 | 1.150227 | 1.439999 |
| H    | -2.28066 | -4.89918 | -1.10728 |
| H    | -6.96449 | -5.12739 | -0.3872  |
| H    | -4.6124  | -5.61367 | -0.93909 |
| H    | -0.56569 | -3.15891 | -0.90823 |
| H    | -0.596   | 1.449129 | 0.466589 |
| H    | -2.92185 | 1.895818 | 1.165178 |
| C    | -11.77   | -1.7677  | 0.700573 |
| H    | -12.4264 | -2.49499 | 1.173966 |
| C    | -10.4475 | -2.27488 | 0.650768 |
| C    | -10.165  | -3.52747 | 1.195403 |
| S    | -8.98028 | -1.55814 | 0.008174 |
| C    | -8.82596 | -3.89842 | 1.108104 |
| H    | -10.9434 | -4.13085 | 1.655992 |
| C    | -8.03731 | -2.93365 | 0.498765 |
| H    | -8.41996 | -4.8256  | 1.500545 |
| C    | 0.422506 | -0.76544 | -0.56681 |
| C    | 0.921022 | -1.28096 | -1.73757 |
| S    | 1.731048 | -0.23107 | 0.458702 |
| C    | 2.331884 | -1.23966 | -1.82157 |



---

|   |          |          |          |
|---|----------|----------|----------|
| H | 0.276527 | -1.63569 | -2.53725 |
| H | 2.89072  | -1.56929 | -2.69281 |
| N | 8.498433 | -0.0331  | 0.311337 |
| C | 9.011883 | 1.234245 | 0.692222 |
| C | 9.870308 | 1.332642 | 1.793651 |
| C | 8.668463 | 2.378571 | -0.03332 |
| C | 10.39304 | 2.563915 | 2.178346 |
| H | 10.12218 | 0.428355 | 2.343084 |
| H | 8.007547 | 2.292896 | -0.89441 |
| C | 10.04421 | 3.701827 | 1.469627 |
| H | 11.05992 | 2.624807 | 3.038021 |
| C | 9.387262 | -1.13325 | 0.224082 |
| C | 10.64364 | -0.96478 | -0.36525 |
| C | 9.020599 | -2.38225 | 0.742853 |
| H | 10.92348 | 0.00823  | -0.76575 |
| C | 9.888196 | -3.46772 | 0.661967 |
| C | 11.13594 | -3.30205 | 0.083334 |
| H | 9.585646 | -4.43287 | 1.067902 |
| C | 11.51045 | -2.04746 | -0.42015 |
| C | 12.8639  | -2.15558 | -0.96249 |
| C | 12.24328 | -4.31835 | -0.10761 |
| C | 9.180257 | 3.605192 | 0.368501 |
| C | 9.000057 | 4.943608 | -0.19249 |
| C | 10.47331 | 5.13668  | 1.701532 |
| C | 9.749667 | 5.84792  | 0.574871 |
| C | 9.75942  | 7.196111 | 0.257478 |
| C | 8.257035 | 5.38346  | -1.28259 |
| C | 9.016255 | 7.638266 | -0.83661 |
| H | 10.33988 | 7.902245 | 0.850973 |
| C | 8.272333 | 6.73852  | -1.59895 |
| H | 7.674326 | 4.68305  | -1.87846 |
| H | 9.01614  | 8.693707 | -1.0988  |
| H | 7.69838  | 7.099988 | -2.44899 |
| C | 13.30626 | -3.47521 | -0.78579 |
| C | 14.56977 | -3.85245 | -1.20969 |
| C | 13.68275 | -1.20611 | -1.56375 |
| C | 15.39262 | -2.90106 | -1.8122  |
| H | 14.91909 | -4.87602 | -1.07503 |
| C | 14.95149 | -1.5899  | -1.98682 |
| H | 13.33984 | -0.18186 | -1.69971 |
| H | 16.38755 | -3.18303 | -2.1489  |
| H | 15.60691 | -0.86099 | -2.45779 |
| C | 10.00366 | 5.641865 | 3.067765 |
| H | 8.918018 | 5.536342 | 3.172496 |

---

---

|   |          |          |          |
|---|----------|----------|----------|
| H | 10.48369 | 5.075652 | 3.875977 |
| H | 10.26003 | 6.700653 | 3.199325 |
| C | 11.99033 | 5.291359 | 1.574894 |
| H | 12.28385 | 6.343498 | 1.679946 |
| H | 12.50416 | 4.718854 | 2.357516 |
| H | 12.34149 | 4.932913 | 0.600754 |
| C | 11.7907  | -5.47053 | -1.00758 |
| H | 10.97533 | -6.03232 | -0.53434 |
| H | 11.43376 | -5.09605 | -1.97363 |
| H | 12.61766 | -6.16754 | -1.19335 |
| C | 12.73907 | -4.86114 | 1.234678 |
| H | 11.94158 | -5.41366 | 1.747583 |
| H | 13.5836  | -5.54641 | 1.088937 |
| H | 13.06782 | -4.04627 | 1.889416 |
| C | -12.6828 | 1.563375 | -0.59974 |
| C | -13.9377 | 1.11806  | -0.1019  |
| C | -15.0327 | 1.944894 | -0.20418 |
| C | -14.8903 | 3.221392 | -0.80478 |
| C | -13.6207 | 3.652201 | -1.3034  |
| C | -12.509  | 2.783672 | -1.18517 |
| C | -11.6697 | 0.52063  | -0.37145 |
| C | -12.3619 | -0.59848 | 0.296919 |
| C | -13.7682 | -0.23625 | 0.458754 |
| H | -16.0156 | 1.660294 | 0.159092 |
| O | -10.4903 | 0.584117 | -0.68019 |
| C | -14.7809 | -0.98324 | 1.02291  |
| C | -16.1234 | -0.51504 | 1.12576  |
| N | -17.2273 | -0.15727 | 1.223137 |
| C | -14.6044 | -2.29176 | 1.559735 |
| N | -14.4804 | -3.36178 | 2.003626 |
| H | 8.043271 | -2.49142 | 1.207433 |
| C | 4.35826  | -0.51437 | -0.44761 |
| C | 4.82354  | 0.407514 | 0.499153 |
| C | 5.317016 | -1.26974 | -1.13713 |
| C | 6.174401 | 0.561158 | 0.75713  |
| H | 4.111607 | 1.021677 | 1.048696 |
| C | 6.67074  | -1.10438 | -0.90565 |
| H | 4.992803 | -2.00838 | -1.86728 |
| C | 7.12479  | -0.19111 | 0.055789 |
| H | 6.505923 | 1.275295 | 1.50693  |
| H | 7.391799 | -1.69604 | -1.4641  |
| C | 2.936453 | -0.69558 | -0.71449 |
| H | -11.5271 | 3.079576 | -1.55188 |
| C | -13.5145 | 4.930636 | -1.89703 |

---

|   |          |          |          |
|---|----------|----------|----------|
| H | -12.5451 | 5.251428 | -2.27415 |
| C | -15.9999 | 4.092367 | -0.92104 |
| H | -16.963  | 3.758746 | -0.53947 |
| C | -15.8642 | 5.327986 | -1.50171 |
| H | -16.7242 | 5.987565 | -1.58402 |
| C | -14.6107 | 5.750866 | -1.99396 |
| H | -14.5166 | 6.732519 | -2.45151 |

**Table S10:** Calculated energies (E) and energy gap ( $\Delta E$ ) for **MCPTR**, **MCPTD1**, **MCPTD2**, **MCPTD3**, **MCPTD4**, **MCPTD5**, **MCPTD6**, **MCPTD7** and **MCPTD8**.

| System        | E <sub>(HOMO-1)</sub> | E <sub>(LUMO-1)</sub> | $\Delta E$ | E <sub>(HOMO-2)</sub> | E <sub>(LUMO-2)</sub> | $\Delta E$ |
|---------------|-----------------------|-----------------------|------------|-----------------------|-----------------------|------------|
| <b>MCPTR</b>  | -6.667                | -1.648                | 5.019      | -6.955                | -0.819                | 6.136      |
| <b>MCPTD1</b> | -5.698                | -1.847                | 3.851      | -6.212                | -1.057                | 5.155      |
| <b>MCPTD2</b> | -5.687                | -2.418                | 3.269      | -6.214                | -1.909                | 4.305      |
| <b>MCPTD3</b> | -5.719                | -2.520                | 3.199      | -6.229                | -1.930                | 4.299      |
| <b>MCPTD4</b> | -5.722                | -2.569                | 3.153      | -6.229                | -1.936                | 4.293      |
| <b>MCPTD5</b> | -5.726                | -2.627                | 3.099      | -6.230                | -1.960                | 4.270      |
| <b>MCPTD6</b> | -5.734                | -2.703                | 3.780      | -6.229                | -1.974                | 4.255      |
| <b>MCPTD7</b> | -5.762                | -3.089                | 2.673      | -6.236                | -2.072                | 4.164      |
| <b>MCPTD8</b> | -5.704                | -2.304                | 3.400      | -6.221                | -1.947                | 4.274      |

$E$ = energy,  $\Delta E(eV) = E_{LUMO} - E_{HOMO}$ ; HOMO= highest occupied molecular orbital; LUMO= lowest unoccupied molecular orbital, MO, molecular orbital

**Table S11:** Dipole moments, dipole polarizability and major contributing tensor (a.u) of (**MCPTR** – **MCPTD8**).

| System        | $\alpha_{xx}$ | $\alpha_{yy}$ | $\alpha_{zz}$ | $\mu_x$ | $\mu_y$ | $\mu_z$ |
|---------------|---------------|---------------|---------------|---------|---------|---------|
| <b>MCPTR</b>  | 868.3         | 564.5         | 244.6         | -0.669  | -2.910  | -1.848  |
| <b>MCPTD1</b> | 1967.8        | 1239.7        | 715.8         | 1.052   | -2.880  | 1.556   |
| <b>MCPTD2</b> | 2339.5        | 1007.5        | 1081.0        | -4.031  | -0.383  | 0.422   |
| <b>MCPTD3</b> | 2430.9        | 1379.5        | 696.0         | -4.715  | 0.561   | -0.268  |
| <b>MCPTD4</b> | 2473.9        | 1386.2        | 686.5         | -4.341  | 0.778   | -0.052  |
| <b>MCPTD5</b> | 2518.8        | 1472.2        | 699.3         | -4.950  | -0.701  | 0.154   |
| <b>MCPTD6</b> | 2560.5        | 1471.1        | 718.2         | -4.605  | -0.746  | 0.189   |
| <b>MCPTD7</b> | 2668.8        | 1493.9        | 700.2         | -6.337  | -3.325  | -0.792  |
| <b>MCPTD8</b> | 2509.3        | 1563.6        | 716.7         | -3.860  | 1.232   | 0.95    |

**Table S12:** The computed first-order hyperpolarizabilities ( $\beta_{tot}$ ) and major contributing tensors (a.u) of the studied compounds (**MCPTR** – **MCPTD8**).

| Compound      | $\beta_{xxx}$ | $\beta_{xyy}$ | $\beta_{yyx}$ | $\beta_{yyy}$ | $\beta_{xxz}$ | $\beta_{yyz}$ | $\beta_{xzz}$ | $\beta_{yzz}$ | $\beta_{zzz}$ |
|---------------|---------------|---------------|---------------|---------------|---------------|---------------|---------------|---------------|---------------|
| <b>MCPTR</b>  | -23469.6      | -1493.0       | -49.1         | 343.8         | -2612.2       | 95.6          | -268.1        | 60.7          | 12.0          |
| <b>MCPTD1</b> | 74202.8       | -2823.4       | -948.3        | -674.2        | -829.9        | -384.6        | 145.7         | 130.2         | -55.9         |
| <b>MCPTD2</b> | -145431       | 16235.8       | -2046.2       | 884.9         | 16526.6       | 157.6         | -3473.1       | -552.8        | 538.2         |
| <b>MCPTD3</b> | -190677       | 15355.4       | -1103.0       | -1658.1       | -578.5        | -1741.3       | 494.6         | 531.0         | -257.0        |
| <b>MCPTD4</b> | -213956       | 15659.2       | -1185.1       | -1614.1       | -1702.9       | -1611.3       | 432.4         | -382.3        | -164.2        |
| <b>MCPTD5</b> | -221413       | -14432.4      | -578.0        | 3673.8        | 2347.7        | 2292.9        | 490.4         | 567.8         | 238.0         |
| <b>MCPTD6</b> | -234466       | -10854        | 440.3         | 3055.4        | 7854.0        | 2005.1        | 227.8         | 325.9         | 136.5         |

|               |         |          |         |         |         |        |       |        |       |
|---------------|---------|----------|---------|---------|---------|--------|-------|--------|-------|
| <b>MCPTD7</b> | -323771 | -24682.8 | -3571.6 | -1480.9 | 2616.69 | 282.1  | 238.8 | -204.1 | -68.5 |
| <b>MCPTD8</b> | -193705 | -15936.1 | 1081.4  | 6106.6  | 4871.31 | 3172.3 | 625.7 | 696.4  | 200.6 |

**Table S13:** Second order hyper polarizability  $\langle\gamma\rangle$  and major contributing tensor  $\gamma$  (*a.u.*) of the studied compounds (**MCPTR** – **MCPTD8**).

| <i>Systems</i> | $\gamma_x$          | $\gamma_y$          | $\gamma_z$          | $\langle\gamma\rangle$ |
|----------------|---------------------|---------------------|---------------------|------------------------|
| <b>MCPTR</b>   | $2.0926\times 10^6$ | $3.4699\times 10^4$ | $1.7853\times 10^4$ | $2.1452\times 10^6$    |
| <b>MCPTD1</b>  | $1.2703\times 10^7$ | $4.1332\times 10^5$ | $9.2633\times 10^4$ | $1.3209\times 10^7$    |
| <b>MCPTD2</b>  | $2.8913\times 10^7$ | $8.2481\times 10^5$ | $5.0194\times 10^5$ | $3.02404\times 10^7$   |
| <b>MCPTD3</b>  | $4.0204\times 10^7$ | $7.9625\times 10^5$ | $9.7075\times 10^4$ | $4.1097\times 10^7$    |
| <b>MCPTD4</b>  | $4.6731\times 10^7$ | $8.0632\times 10^5$ | $9.4683\times 10^4$ | $4.7632\times 10^7$    |
| <b>MCPTD5</b>  | $4.8823\times 10^7$ | $1.0162\times 10^6$ | $1.2087\times 10^5$ | $4.9960\times 10^7$    |
| <b>MCPTD6</b>  | $5.2915\times 10^7$ | $9.4374\times 10^5$ | $1.7328\times 10^5$ | $5.4032\times 10^7$    |
| <b>MCPTD7</b>  | $8.4527\times 10^7$ | $1.3547\times 10^6$ | $1.4219\times 10^5$ | $8.6024\times 10^7$    |
| <b>MCPTD8</b>  | $4.043\times 10^7$  | $1.215\times 10^6$  | $1.640\times 10^5$  | $4.180\times 10^7$     |

**Table S14:** Wave length, excitation energy and oscillator strength of investigated compound (**MCPTR**)

| NO. | DFT<br>$\lambda$ (nm)     | E (eV) | $f$    | MO contributions                                                              |
|-----|---------------------------|--------|--------|-------------------------------------------------------------------------------|
| 1   | 481.212(424) <sup>a</sup> | 2.577  | 0.619  | H→L (99%)                                                                     |
| 2   | 368.332                   | 3.3661 | 0.3682 | H-1→L (68%), H→L+1 (25%), H→L+2 (3%)                                          |
| 3   | 349.517                   | 3.5473 | 0.21   | H-2→L (14%), H-1→L (16%), H→L+1 (57%), H→L+2 (7%)                             |
| 4   | 336.858                   | 3.6806 | 0.3255 | H-2→L (58%), H→L+1 (12%), H→L+2 (12%), H-1→L (8%), H-1→L+1 (3%), H-1→L+2 (2%) |
| 5   | 315.795                   | 3.9261 | 0.0039 | H-2→L (24%), H-1→L+1 (23%), H→L+2 (38%), H-2→L+1 (6%)                         |
| 6   | 297.788                   | 4.1635 | 0.0196 | H-2→L (24%), H-1→L+1 (23%), H→L+2 (38%), H-2→L+1 (6%),                        |

MO=molecular orbital, H=HOMO, L=LUMO,  $f$ = oscillator strength

**Table S15:** Wave length, excitation energy and oscillator strength of investigated compound (**MCPTD1**)

| NO. | DFT<br>$\lambda$ (nm) | E (eV) | $f$     | MO contributions                                       |
|-----|-----------------------|--------|---------|--------------------------------------------------------|
| 1   | 547.050               | 2.2664 | 0.07388 | H-1 → L (15%), H→ L (82%) H→ L+1 (2%)                  |
| 2   | 470.168               | 2.6370 | 0.3224  | H-1→ L (81%), H → L (16%)                              |
| 3   | 435.978               | 2.8438 | 0.8646  | H→ L+1 (85%), H → L+1 (5%), H→ L+2 (4%)                |
| 4   | 375.889               | 3.2984 | 0.1911  | H-5→ L (13%), H-1→ L+1 (62%) H → L1 (5%), H-3→ L (8%), |

|   |         |        |        |                                                                                              |
|---|---------|--------|--------|----------------------------------------------------------------------------------------------|
|   |         |        |        | H→L+1 (4%)                                                                                   |
| 5 | 369.846 | 3.3523 | 0.0635 | H-4→L (11%), H-3→L (46%), H-2→L (12%), H-5→L (4%),<br>H-1→L+1 (9%), H-1→L+4 (3%), H→L+2 (5%) |
| 6 | 364.036 | 3.4058 | 0,1113 | H-5→L (39%), H-1→1→L+1 (15%), H→L+2 (20%), H-5→<br>L+1 (2%), H-3→L (3%), H-2→L (2%)          |

MO=molecular orbital, H=HOMO, L=LUMO,  $f$ = oscillator strength

**Table S16: Wave length, excitation energy and oscillator strength of investigated compound (MCPTD2)**

| NO. | DFT $\lambda$ (nm) | E (eV) | $f$    | MO contributions                                                                         |
|-----|--------------------|--------|--------|------------------------------------------------------------------------------------------|
| 1   | 664.505            | 1.8658 | 0.4558 | H-1→L (11%), H→L (87%)                                                                   |
| 2   | 569.070            | 2.1787 | 0.5143 | H-1→L (82%), H→L (12%)                                                                   |
| 3   | 494.450            | 2.5075 | 0.2124 | H-1→L+1 (10%), H→L+1 (83%), H→L+2 (3%)                                                   |
| 4   | 445.855            | 2.7808 | 1.0276 | H-4→L (14%), H→L+2 (51%), H-5→L (9%), H-3→L(8%),<br>H-1→L+2 (6%), H→L+1 (2%), H→L+3 (2%) |
| 5   | 440.626            | 2.8138 | 0.106  | H-1→L+1 (78%), H→L+1 (11%), H-4→L+1 (2%),<br>H-3→L+1 (2%)                                |
| 6   | 435.755            | 2.8518 | 0.1345 | H-4→L (19%), H-3→L (28%), H→L+2 (30%),H-5→L (4%),<br>H-2→L(8%), H→L+1 (2%)               |

MO=molecular orbital, H=HOMO, L=LUMO,  $f$ = oscillator strength.

**Table S17: Wave length, excitation energy and oscillator strength of investigated compound (MCPTD3)**

| NO. | DFT $\lambda$ (nm) | E (eV) | $f$    | MO contributions                                     |
|-----|--------------------|--------|--------|------------------------------------------------------|
| 1   | 697.123            | 1.7785 | 0.4535 | H→L (90%), H-1→L (8%)                                |
| 2   | 578.658            | 2.1426 | 0.5421 | H-1→L (84%), H→L (9%)                                |
| 3   | 517.827            | 2.3943 | 0.1583 | H→L+1 (86%), H-1→L+1 (8%)                            |
| 4   | 453.122            | 2.7362 | 0.9009 | H-4→L (13%), H→L+2 (46%), H-5→L (9%), H-<br>3→L (8%) |
| 5   | 451.736            | 2.7446 | 0.3275 | H-1→L+1 (72%), H→L+1 (11%), H-4→L+1 (2%),            |
| 6   | 441.882            | 2.8058 | 0.1248 | H-4→L (15%), H-3→L (31%), H-2→L(10%),<br>H→L+2 (33%) |

MO=molecular orbital, H=HOMO, L=LUMO,  $f$ = oscillator strength.

**Table S18:** Wave length, excitation energy and oscillator strength of investigated compound (MCPTD4)

| NO. | DFT $\lambda$ (nm) | E (eV) | $f$    | MO contributions                                                                                                                                                                                       |
|-----|--------------------|--------|--------|--------------------------------------------------------------------------------------------------------------------------------------------------------------------------------------------------------|
| 1   | 720.205            | 1.7215 | 0.4299 | H $\rightarrow$ L (91%), H-1 $\rightarrow$ L (8%)                                                                                                                                                      |
| 2   | 593.108            | 2.0904 | 0.5408 | H-1 $\rightarrow$ L (86%), H $\rightarrow$ L (9%)                                                                                                                                                      |
| 3   | 529.052            | 2.3435 | 0.1662 | H $\rightarrow$ L+1 (87%), H-1 $\rightarrow$ L+1 (8%)                                                                                                                                                  |
| 4   | 459.266            | 2.6996 | 0.2444 | H-1 $\rightarrow$ L+1 (77%), H $\rightarrow$ L+1 (10%), H-4 $\rightarrow$ L+1 (2%), H-3 $\rightarrow$ L+1 (2%)                                                                                         |
| 5   | 457.132            | 2.7122 | 0.8075 | H-5 $\rightarrow$ L (13%), H-4 (20%), H-3 $\rightarrow$ L (20%), H $\rightarrow$ L+2 (27%), H-2 $\rightarrow$ L (5%), H-1 $\rightarrow$ L (3%), H-1 $\rightarrow$ L+1 (6%), H-1 $\rightarrow$ L+2 (3%) |
| 6   | 446.529            | 2.7766 | 0.3056 | H-3 $\rightarrow$ L (23%), H-2 $\rightarrow$ L (11%), H $\rightarrow$ L+2 (53%), H-4 $\rightarrow$ L (5%), H $\rightarrow$ L+3 (2%)                                                                    |

MO=molecular orbital, H=HOMO, L=LUMO,  $f$ = oscillator strength.

**Table S19:** Wave length, excitation energy and oscillator strength of investigated compound (MCPTD5)

| NO. | DFT $\lambda$ (nm) | E (eV) | $f$    | MO contributions                                                                                                                                                 |
|-----|--------------------|--------|--------|------------------------------------------------------------------------------------------------------------------------------------------------------------------|
| 1   | 724.286            | 1.7118 | 0.4375 | H $\rightarrow$ L (91%), H-1 $\rightarrow$ L (8%)                                                                                                                |
| 2   | 596.246            | 2.0794 | 0.5567 | H-1 $\rightarrow$ L (85%), H $\rightarrow$ L (9%)                                                                                                                |
| 3   | 539.011            | 2.3002 | 0.1093 | H $\rightarrow$ L+1 (88%), H-1 $\rightarrow$ L (2%), H-1 $\rightarrow$ L+1 (8%)                                                                                  |
| 4   | 467.368            | 2.6528 | 0.1173 | H-1 $\rightarrow$ L+1 (82%), H $\rightarrow$ L+1 (10%), H-4 $\rightarrow$ L+1 (2%), H-3 $\rightarrow$ L+1 (2%)                                                   |
| 5   | 459.283            | 2.6995 | 1.0156 | H-5 $\rightarrow$ L (12%), H-4 $\rightarrow$ L (18%), H-3 $\rightarrow$ L (18%), H $\rightarrow$ L+2 (34%), H-1 $\rightarrow$ L (3%), H-1 $\rightarrow$ L+2 (4%) |
| 6   | 448.840            | 2.7623 | 0.2484 | H-3 $\rightarrow$ L (25%), H-2 $\rightarrow$ L (13%), H-4 $\rightarrow$ L (7%)                                                                                   |

MO=molecular orbital, H=HOMO, L=LUMO,  $f$ = oscillator strength.

**Table 20:** Wave length, excitation energy and oscillator strength of investigated compound (MCPTD6)

| NO. | DFT $\lambda$ (nm) | E (eV) | $f$    | MO contributions                                                                |
|-----|--------------------|--------|--------|---------------------------------------------------------------------------------|
| 1   | 743.667            | 1.6672 | 0.3876 | H-1 $\rightarrow$ L (92%),                                                      |
| 2   | 609.738            | 2.0334 | 0.5522 | H-1 $\rightarrow$ L (86%), H $\rightarrow$ L (8%)                               |
| 3   | 554.739            | 2.2350 | 0.0937 | H $\rightarrow$ L+1 (88%), H-1 $\rightarrow$ L (2%), H-1 $\rightarrow$ L+1 (8%) |

|   |         |        |        |                                                                              |
|---|---------|--------|--------|------------------------------------------------------------------------------|
| 4 | 479.592 | 2.5852 | 0.1313 | H-1→L+1 (83%), H-4→L+1 (2%), H-3→L+1 (2%), H→L+1 (9%)                        |
| 5 | 464.482 | 2.6693 | 0.7603 | H-5→L (14%), H-4→L (21%), H-3→L (30%), H→L+2 (14%), H-1→L (3%), H-1→L+2 (3%) |
| 6 | 452.348 | 2.7409 | 0.4850 | H-3→L (15%), H-2→L (16%), H→L+2 (59%), H-1→L+2 (2%)                          |

MO=molecular orbital, H=HOMO, L=LUMO,  $f$ = oscillator strength

**Table 21:** Wave length, excitation energy and oscillator strength of investigated Compound (MCPTD7)

| NO. | DFT $\lambda$ (nm) | E (eV) | $F$    | MO contributions                                                      |
|-----|--------------------|--------|--------|-----------------------------------------------------------------------|
| 1   | 832.33             | 1.4896 | 0.2774 | H → L (94%), H-1→L (4%)                                               |
| 2   | 669.85             | 1.8509 | 0.4875 | H-1 → L (22%), H → L+1 (66%), H-1→ L+1 (7%), H→ L (3%)                |
| 3   | 653.85             | 1.8962 | 0.1131 | H-1 → L (69%), H → L+1 (26%), H→ L (2%)                               |
| 4   | 552.51             | 2.2440 | 0.2039 | H-1 → L+1 (87%), H→ L+1 (7%)                                          |
| 5   | 491.33             | 2.5234 | 0.286  | H-4 → L (14%), H-3 → L (44%), H-2 → L (26%), H-5 → L (8%), H-1→L (3%) |
| 6   | 477.96             | 2.5940 | 0.1161 | H-3 → L (15%), H-2 → L (73%), H-5 → L (4%), H-4→ L (4%), H → L+2 (2%) |

MO=molecular orbital, H=HOMO, L=LUMO,  $f$ = oscillator strength.

**Table S22:** Wave length, excitation energy and oscillator strength of investigated Compound (MCPTD8)

| NO. | DFT $\lambda$ (nm) | E (eV) | $f$    | MO contributions                                                                                                |
|-----|--------------------|--------|--------|-----------------------------------------------------------------------------------------------------------------|
| 1   | 691.60             | 1.7927 | 0.4879 | H-1 → L (10%), H →L (89%)                                                                                       |
| 2   | 581.04             | 2.1338 | 0.5772 | H-1→ L (84%), H → L (11%)                                                                                       |
| 3   | 475.58             | 2.6070 | 0.4446 | H → L+1 (74%), H → L+2 (12%), H-1→ L+1 (7%)                                                                     |
| 4   | 452.44             | 2.7403 | 0.5511 | H-4→ L (40%), H-3→ L (25%), H→ L+1 (10%), H-5 → L (5%), H-2→ L (3%), H→L (2%), H-1→ L+2 (3%), H→ L+2 (9%)       |
| 5   | 444.13             | 2.7916 | 0.3673 | H-6→ L (11%), H → L+2 (54%), H-5→ L (7%), H-4→ L (8%), H-3 → L (4%), H-1→ L+1 (3%), H-1→ L+2 (3%), H → L+1 (4%) |
| 6   | 434.91             | 2.8508 | 0.1283 | H-6 → L (27%), H-5→ L (26%), H-3 → L (20%), H-4 → L (3%), H-2→ L(9%), H → L+1 (2%), H→ L+2 (8%)                 |

MO=molecular orbital, H=HOMO, L=LUMO,  $f$ = oscillator strength

**Table S23:** Natural bond orbital (NBO) analysis of investigated compound (**MCPTR**)

| Donor(i) | Type     | Acceptor(j) | Type       | E (2) <sup>a</sup><br>[kcal/mol] | E(J)E(i) <sup>b</sup> (a.u) | F(I→j) <sup>c</sup> (a.u) |
|----------|----------|-------------|------------|----------------------------------|-----------------------------|---------------------------|
| C26-C28  | $\pi$    | C31-O32     | $\pi^*$    | 24.36                            | 0.31                        | 0.079                     |
| C3-C4    | $\pi$    | C8-C15      | $\pi^*$    | 22.41                            | 0.29                        | 0.072                     |
| C5-C6    | $\pi$    | C1-C2       | $\pi^*$    | 20.91                            | 0.3                         | 0.072                     |
| C5-C6    | $\pi$    | C3-C4       | $\pi^*$    | 18.37                            | 0.29                        | 0.067                     |
| C9-C11   | $\pi$    | C7-C10      | $\pi^*$    | 17.66                            | 0.3                         | 0.069                     |
| C53-C54  | $\pi$    | C56-C58     | $\pi^*$    | 15.98                            | 0.3                         | 0.063                     |
| C3-C4    | $\pi$    | C7-C10      | $\pi^*$    | 13.88                            | 0.3                         | 0.062                     |
| C26-C28  | $\pi$    | C53-C54     | $\pi^*$    | 9.95                             | 0.31                        | 0.052                     |
| C31-O32  | $\pi$    | C31-O32     | $\pi^*$    | 0.75                             | 0.42                        | 0.017                     |
| O32      | LP(2)    | C31-O33     | $\sigma^*$ | 35.28                            | 0.66                        | 0.138                     |
| S55      | LP(2)    | C56-C58     | $\pi^*$    | 25.1                             | 0.28                        | 0.075                     |
| S55      | LP(2)    | C53-C54     | $\pi^*$    | 22.52                            | 0.27                        | 0.07                      |
| O32      | LP(2)    | C28-C31     | $\sigma^*$ | 20.86                            | 0.73                        | 0.112                     |
| N30      | LP(1)    | C28-C29     | $\sigma^*$ | 12.75                            | 1.07                        | 0.105                     |
| O33      | LP(1)    | C31-O32     | $\sigma^*$ | 8.19                             | 1.19                        | 0.088                     |
| O33      | LP(2)    | C34-H36     | $\sigma^*$ | 4.75                             | 0.76                        | 0.056                     |
| O33      | LP(2)    | C34-H37     | $\sigma^*$ | 4.55                             | 0.76                        | 0.055                     |
| O32      | LP(1)    | C28-C31     | $\sigma^*$ | 2.60                             | 1.16                        | 0.05                      |
| S55      | LP(1)    | C56-C58     | $\sigma^*$ | 2.30                             | 1.25                        | 0.048                     |
| S55      | LP(1)    | C53-C54     | $\sigma^*$ | 2.09                             | 1.24                        | 0.046                     |
| S55      | LP(2)    | C17-H18     | $\sigma^*$ | 1.48                             | 0.71                        | 0.032                     |
| O32      | LP(1)    | C31-O33     | $\sigma^*$ | 1.41                             | 1.1                         | 0.036                     |
| O33      | LP(1)    | C34-C35     | $\sigma^*$ | 1.01                             | 1.01                        | 0.03                      |
| O33      | LP(1)    | C34-H37     | $\sigma^*$ | 1.02                             | 1.01                        | 0.029                     |
| O33      | LP(1)    | C34-H36     | $\sigma^*$ | 1.00                             | 1.01                        | 0.028                     |
| O33      | LP(1)    | C26-H27     | $\sigma^*$ | 0.96                             | 1.01                        | 0.028                     |
| O32      | LP(2)    | C29-N30     | $\pi^*$    | 0.87                             | 0.39                        | 0.017                     |
| O32      | LP(2)    | C34-C35     | $\sigma^*$ | 0.8                              | 0.7                         | 0.022                     |
| O33      | LP(1)    | C28-C31     | $\sigma^*$ | 0.68                             | 1.03                        | 0.024                     |
| O33      | LP(1)    | C35-C38     | $\sigma^*$ | 0.61                             | 1.01                        | 0.022                     |
| C26-H27  | $\sigma$ | C28-C29     | $\sigma^*$ | 6.92                             | 1.07                        | 0.077                     |
| C29-N30  | $\sigma$ | C28-C29     | $\sigma^*$ | 5.99                             | 1.58                        | 0.088                     |
| C28-C29  | $\sigma$ | C29-N30     | $\sigma^*$ | 5.47                             | 1.6                         | 0.084                     |
| C17-H18  | $\sigma$ | C4-C5       | $\sigma^*$ | 4.00                             | 1.09                        | 0.059                     |
| C38-H42  | $\sigma$ | C43-H46     | $\sigma^*$ | 3.00                             | 0.92                        | 0.047                     |
| C8-C15   | $\sigma$ | C14-H25     | $\sigma^*$ | 2.04                             | 1.13                        | 0.043                     |
| C56-H59  | $\sigma$ | C56-C58     | $\sigma^*$ | 1.96                             | 1.11                        | 0.042                     |
| C1-C6    | $\sigma$ | C1-H21      | $\sigma^*$ | 1.00                             | 1.15                        | 0.03                      |
| C34-C35  | $\sigma$ | C35-H40     | $\sigma^*$ | 0.51                             | 1.06                        | 0.021                     |
| C34-H36  | $\sigma$ | C34-C35     | $\sigma^*$ | 0.51                             | 0.94                        | 0.019                     |
| C35-H39  | $\sigma$ | C35-C38     | $\sigma^*$ | 0.51                             | 0.91                        | 0.019                     |



**Table S24:** Natural bond orbital (NBO) analysis of (MCPTD1)

| Donor(i) | Type  | Acceptor(j) | Type       | E(2)  | E(J)E(i)b(a.u) | F(I→j)e(a.u) |
|----------|-------|-------------|------------|-------|----------------|--------------|
| C2-C3    | $\pi$ | C1-C6       | $\pi^*$    | 25.17 | 0.28           | 0.076        |
| C25-C27  | $\pi$ | C30-O31     | $\pi^*$    | 24.34 | 0.31           | 0.079        |
| C11-C12  | $\pi$ | C13-C14     | $\pi^*$    | 22.04 | 0.3            | 0.073        |
| C8-C9    | $\pi$ | C4-C5       | $\pi^*$    | 21.99 | 0.28           | 0.07         |
| C77-C79  | $\pi$ | C78-C80     | $\pi^*$    | 20.00 | 0.3            | 0.069        |
| C69-C73  | $\pi$ | C68-C71     | $\pi^*$    | 19.25 | 0.3            | 0.069        |
| C15-C16  | $\pi$ | C13-C14     | $\pi^*$    | 16.44 | 0.31           | 0.067        |
| C7-C10   | $\pi$ | C8-C9       | $\pi^*$    | 14.41 | 0.31           | 0.063        |
| C94-C110 | $\pi$ | C91-C93     | $\pi^*$    | 13.72 | 0.3            | 0.058        |
| C25-C27  | $\pi$ | C52-C53     | $\pi^*$    | 9.99  | 0.31           | 0.052        |
| C28-N29  | $\pi$ | C25-C27     | $\pi^*$    | 7.14  | 0.38           | 0.049        |
| C55-C57  | $\pi$ | C1-C6       | $\pi^*$    | 6.48  | 0.32           | 0.042        |
| C30-O31  | $\pi$ | C25-C27     | $\pi^*$    | 3.98  | 0.43           | 0.039        |
| C25-C27  | $\pi$ | C25-C27     | $\pi^*$    | 2.21  | 0.32           | 0.024        |
| C55-C57  | $\pi$ | C55-C57     | $\pi^*$    | 0.66  | 0.3            | 0.013        |
| O31      | LP(2) | C30-O32     | $\sigma^*$ | 35.26 | 0.66           | 0.138        |
| N76      | LP(1) | C69-C73     | $\pi^*$    | 24.99 | 0.29           | 0.079        |
| S54      | LP(2) | C55-C57     | $\pi^*$    | 24.97 | 0.28           | 0.075        |
| S61      | LP(2) | C62-C64     | $\pi^*$    | 23.61 | 0.29           | 0.074        |
| S54      | LP(2) | C52-C53     | $\pi^*$    | 22.58 | 0.27           | 0.07         |
| S61      | LP(2) | C59-C60     | $\pi^*$    | 22.50 | 0.29           | 0.072        |
| O31      | LP(2) | C27-C30     | $\sigma^*$ | 20.85 | 0.73           | 0.112        |
| N76      | LP(1) | C85-C86     | $\pi^*$    | 19.69 | 0.29           | 0.07         |
| N76      | LP(1) | C77-C79     | $\pi^*$    | 17.41 | 0.29           | 0.066        |
| N29      | LP(1) | C27-C28     | $\sigma^*$ | 12.76 | 1.07           | 0.105        |
| O32      | LP(1) | C30-O31     | $\sigma^*$ | 8.18  | 1.19           | 0.088        |
| O32      | LP(2) | C33-H35     | $\sigma^*$ | 4.78  | 0.76           | 0.056        |
| O32      | LP(2) | C33-H36     | $\sigma^*$ | 4.52  | 0.76           | 0.055        |
| N76      | LP(1) | C77-C78     | $\sigma^*$ | 3.53  | 0.84           | 0.052        |
| N76      | LP(1) | C77-C79     | $\sigma^*$ | 3.51  | 0.84           | 0.052        |
| N76      | LP(1) | C85-C87     | $\sigma^*$ | 3.17  | 0.84           | 0.049        |
| N76      | LP(1) | C85-C86     | $\sigma^*$ | 3.01  | 0.84           | 0.049        |
| O31      | LP(1) | C27-C30     | $\sigma^*$ | 2.60  | 1.16           | 0.05         |
| N76      | LP(1) | C71-C73     | $\sigma^*$ | 2.60  | 0.84           | 0.044        |
| N76      | LP(1) | C69-C73     | $\sigma^*$ | 2.57  | 0.84           | 0.044        |
| S54      | LP(1) | C55-C57     | $\sigma^*$ | 2.31  | 1.25           | 0.048        |
| S61      | LP(1) | C59-C60     | $\sigma^*$ | 2.12  | 1.25           | 0.046        |
| S61      | LP(1) | C62-C64     | $\sigma^*$ | 2.12  | 1.26           | 0.046        |
| S54      | LP(1) | C52-C53     | $\sigma^*$ | 2.09  | 1.24           | 0.046        |
| O31      | LP(1) | C30-O32     | $\sigma^*$ | 1.40  | 1.1            | 0.036        |
| S54      | LP(2) | C16-H17     | $\sigma^*$ | 1.37  | 0.71           | 0.031        |

|           |          |          |            |      |      |       |
|-----------|----------|----------|------------|------|------|-------|
| O32       | LP(1)    | C33-C34  | $\sigma^*$ | 1.10 | 1.01 | 0.03  |
| O32       | LP(1)    | C33-H36  | $\sigma^*$ | 1.05 | 1.01 | 0.029 |
| O32       | LP(1)    | C33-H35  | $\sigma^*$ | 0.98 | 1.01 | 0.028 |
| O32       | LP(1)    | C25-H26  | $\sigma^*$ | 0.94 | 1.01 | 0.028 |
| O31       | LP(2)    | C28-N29  | $\sigma^*$ | 0.89 | 0.39 | 0.017 |
| O31       | LP(2)    | C33-C34  | $\sigma^*$ | 0.81 | 0.7  | 0.022 |
| O32       | LP(1)    | C27-C30  | $\sigma^*$ | 0.68 | 1.03 | 0.024 |
| C25-H26   | $\sigma$ | C27-C28  | $\sigma^*$ | 6.92 | 1.07 | 0.077 |
| C86-C93   | $\sigma$ | C91-C93  | $\sigma^*$ | 5.00 | 1.3  | 0.072 |
| C77-C79   | $\sigma$ | C77-C78  | $\sigma^*$ | 4.00 | 1.29 | 0.064 |
| C66-C68   | $\sigma$ | C68-C71  | $\sigma^*$ | 3.00 | 1.31 | 0.056 |
| C55-C57   | $\sigma$ | C5-C6    | $\sigma^*$ | 2.01 | 1.31 | 0.046 |
| C1-C6     | $\sigma$ | C1-H20   | $\sigma^*$ | 1.00 | 1.15 | 0.03  |
| S54-C57   | $\sigma$ | C6-C57   | $\sigma^*$ | 0.51 | 1.17 | 0.022 |
| C121-H124 | $\sigma$ | C98-C121 | $\sigma^*$ | 0.50 | 0.89 | 0.019 |

**Table S25:** Natural bond orbital (NBO) analysis of (MCPTD2)

| Donor(i)  | Type  | Acceptor(j) | Type       | E(2)  | E(J)E(i)b(a.u) | F(I→j)e(a.u) |
|-----------|-------|-------------|------------|-------|----------------|--------------|
| C104-C110 | $\pi$ | C111-N112   | $\pi^*$    | 23.02 | 0.4            | 0.088        |
| C47-C59   | $\pi$ | C41-C43     | $\pi^*$    | 22.98 | 0.28           | 0.071        |
| C96-C101  | $\pi$ | C102-O109   | $\pi^*$    | 20.01 | 0.29           | 0.071        |
| C49-C50   | $\pi$ | C51-C53     | $\pi^*$    | 19.97 | 0.3            | 0.069        |
| C37-C126  | $\pi$ | C34-C35     | $\pi^*$    | 17.70 | 0.31           | 0.069        |
| C34-C35   | $\pi$ | C37-C126    | $\pi^*$    | 16.33 | 0.31           | 0.066        |
| C116-C117 | $\pi$ | C37-C126    | $\pi^*$    | 15.58 | 0.28           | 0.06         |
| C25-C103  | $\pi$ | C27-C28     | $\pi^*$    | 10.75 | 0.29           | 0.052        |
| C11-C12   | $\pi$ | C34-C35     | $\pi^*$    | 9.89  | 0.29           | 0.048        |
| C102-O109 | $\pi$ | C96-C101    | $\pi^*$    | 4.04  | 0.43           | 0.041        |
| C102-O109 | $\pi$ | C25-C103    | $\pi^*$    | 3.70  | 0.43           | 0.038        |
| C113-N114 | $\pi$ | C111-N112   | $\pi^*$    | 0.70  | 0.46           | 0.016        |
| N40       | LP(1) | C119-C123   | $\pi^*$    | 25.12 | 0.29           | 0.079        |
| S36       | LP(2) | C37-C126    | $\pi^*$    | 23.71 | 0.29           | 0.074        |
| S36       | LP(2) | C34-C35     | $\pi^*$    | 22.56 | 0.29           | 0.072        |
| S29       | LP(2) | C27-C28     | $\pi^*$    | 22.5  | 0.27           | 0.069        |
| O109      | LP(2) | C96-C102    | $\sigma^*$ | 21.82 | 0.76           | 0.117        |
| O109      | LP(2) | C102-C103   | $\sigma^*$ | 19.45 | 0.76           | 0.11         |
| N40       | LP(1) | C49-C50     | $\pi^*$    | 18.42 | 0.29           | 0.068        |
| N40       | LP(1) | C41-C43     | $\pi^*$    | 17.99 | 0.29           | 0.067        |
| N112      | LP(1) | C110-C111   | $\sigma^*$ | 13.41 | 1.06           | 0.107        |
| N114      | LP(1) | C110-C113   | $\sigma^*$ | 13.41 | 1.06           | 0.107        |
| O109      | LP(1) | C102-C103   | $\sigma^*$ | 3.60  | 1.18           | 0.059        |
| N40       | LP(1) | C41-C42     | $\sigma^*$ | 3.55  | 0.84           | 0.052        |
| N40       | LP(1) | C49-C51     | $\sigma^*$ | 3.49  | 0.84           | 0.051        |
| N40       | LP(1) | C41-C43     | $\sigma^*$ | 3.28  | 0.84           | 0.05         |

|           |          |           |            |      |      |       |
|-----------|----------|-----------|------------|------|------|-------|
| O109      | LP(2)    | S29-C32   | $\sigma^*$ | 3.22 | 0.51 | 0.037 |
| N40       | LP(1)    | C49-C50   | $\sigma^*$ | 3.19 | 0.84 | 0.049 |
| S29       | LP(1)    | C30-C32   | $\sigma^*$ | 2.60 | 1.24 | 0.051 |
| N40       | LP(1)    | C119-C123 | $\sigma^*$ | 2.58 | 0.84 | 0.044 |
| N40       | LP(1)    | C121-C123 | $\sigma^*$ | 2.55 | 0.84 | 0.044 |
| S36       | LP(1)    | C37-C126  | $\sigma^*$ | 2.12 | 1.26 | 0.046 |
| S36       | LP(1)    | C34-C35   | $\sigma^*$ | 2.11 | 1.25 | 0.046 |
| S29       | LP(1)    | C27-C28   | $\sigma^*$ | 1.85 | 1.23 | 0.043 |
| O109      | LP(1)    | S29-C32   | $\sigma^*$ | 1.79 | 0.93 | 0.037 |
| S29       | LP(2)    | C16-H17   | $\sigma^*$ | 1.52 | 0.71 | 0.032 |
| O109      | LP(1)    | C96-C102  | $\sigma^*$ | 1.30 | 1.19 | 0.035 |
| C25-H26   | $\sigma$ | C102-C103 | $\sigma^*$ | 6.78 | 1    | 0.074 |
| C96-C101  | $\sigma$ | C96-C97   | $\sigma^*$ | 5.00 | 1.3  | 0.072 |
| C1-H20    | $\sigma$ | C2-C3     | $\sigma^*$ | 4.00 | 1.11 | 0.06  |
| C116-C126 | $\sigma$ | C116-C118 | $\sigma^*$ | 3.00 | 1.27 | 0.055 |
| N40-C49   | $\sigma$ | C119-C123 | $\sigma^*$ | 2.00 | 1.35 | 0.046 |
| C98-C99   | $\sigma$ | C99-H106  | $\sigma^*$ | 1.00 | 1.17 | 0.031 |

**Table S26:** Natural bond orbital (NBO) analysis of (MCPTD3)

| Donor(i)  | Type  | Acceptor(j) | Type       | E(2)  | E(J)E(i)b(a.u) | F(I→j)e(a.u) |
|-----------|-------|-------------|------------|-------|----------------|--------------|
| C25-C103  | $\pi$ | C104-C108   | $\pi^*$    | 25.98 | 0.3            | 0.079        |
| C54-C56   | $\pi$ | C49-C50     | $\pi^*$    | 23.03 | 0.28           | 0.072        |
| C65-C67   | $\pi$ | C60-C64     | $\pi^*$    | 21.00 | 0.3            | 0.072        |
| C49-C50   | $\pi$ | C51-C53     | $\pi^*$    | 20.02 | 0.3            | 0.069        |
| C8-C9     | $\pi$ | C13-C14     | $\pi^*$    | 19.80 | 0.29           | 0.068        |
| C2-C3     | $\pi$ | C7-C10      | $\pi^*$    | 17.02 | 0.31           | 0.068        |
| C27-C28   | $\pi$ | C30-C32     | $\pi^*$    | 16.52 | 0.3            | 0.063        |
| C8-C9     | $\pi$ | C7-C10      | $\pi^*$    | 15.10 | 0.3            | 0.064        |
| C1-C6     | $\pi$ | C30-C32     | $\pi^*$    | 12.31 | 0.27           | 0.052        |
| C37-C126  | $\pi$ | C116-C117   | $\pi^*$    | 11.73 | 0.32           | 0.058        |
| C25-C103  | $\pi$ | C27-C28     | $\pi^*$    | 10.73 | 0.29           | 0.052        |
| C11-C12   | $\pi$ | C34-C35     | $\pi^*$    | 9.34  | 0.29           | 0.047        |
| C30-C32   | $\pi$ | C1-C6       | $\pi^*$    | 7.44  | 0.32           | 0.044        |
| C111-N112 | $\pi$ | C104-C108   | $\pi^*$    | 6.76  | 0.38           | 0.049        |
| C49-C50   | $\pi$ | C41-C43     | $\pi^*$    | 0.71  | 0.29           | 0.013        |
| C109-N110 | $\pi$ | C111-N112   | $\pi^*$    | 0.70  | 0.46           | 0.016        |
| S29       | LP(2) | C30-C32     | $\pi^*$    | 26.63 | 0.27           | 0.077        |
| S36       | LP(2) | C37-C126    | $\pi^*$    | 23.63 | 0.29           | 0.073        |
| S36       | LP(2) | C34-C35     | $\pi^*$    | 22.43 | 0.29           | 0.072        |
| S29       | LP(2) | C27-C28     | $\pi^*$    | 22.35 | 0.27           | 0.069        |
| O107      | LP(2) | C96-C102    | $\sigma^*$ | 22.19 | 0.76           | 0.118        |
| F115      | LP(3) | C99-C100    | $\pi^*$    | 21.62 | 0.44           | 0.095        |
| F114      | LP(3) | C99-C100    | $\pi^*$    | 21.40 | 0.44           | 0.095        |
| O107      | LP(2) | C102-C103   | $\sigma^*$ | 19.40 | 0.76           | 0.11         |

|           |          |           |            |       |      |       |
|-----------|----------|-----------|------------|-------|------|-------|
| N40       | LP(1)    | C49-C50   | $\pi^*$    | 17.38 | 0.29 | 0.066 |
| N40       | LP(1)    | C41-C43   | $\pi^*$    | 14.92 | 0.29 | 0.061 |
| N110      | LP(1)    | C108-C109 | $\sigma^*$ | 13.43 | 1.06 | 0.107 |
| N112      | LP(1)    | C108-C111 | $\sigma^*$ | 13.43 | 1.06 | 0.107 |
| F115      | LP(2)    | C99-C100  | $\sigma^*$ | 8.30  | 0.97 | 0.08  |
| F114      | LP(2)    | C99-C100  | $\sigma^*$ | 8.22  | 0.97 | 0.08  |
| F115      | LP(2)    | C100-C101 | $\sigma^*$ | 6.87  | 1.01 | 0.075 |
| F114      | LP(2)    | C98-C99   | $\sigma^*$ | 6.72  | 1.01 | 0.074 |
| N40       | LP(1)    | C41-C42   | $\sigma^*$ | 3.98  | 0.84 | 0.055 |
| N40       | LP(1)    | C41-C43   | $\sigma^*$ | 3.86  | 0.84 | 0.054 |
| N40       | LP(1)    | C49-C51   | $\sigma^*$ | 3.62  | 0.84 | 0.052 |
| O107      | LP(1)    | C102-C103 | $\sigma^*$ | 3.62  | 1.18 | 0.059 |
| N40       | LP(1)    | C49-C50   | $\sigma^*$ | 3.41  | 0.84 | 0.051 |
| O107      | LP(2)    | S29-C32   | $\sigma^*$ | 3.18  | 0.51 | 0.037 |
| S29       | LP(1)    | C30-C32   | $\sigma^*$ | 2.6   | 1.24 | 0.051 |
| S36       | LP(1)    | C34-C35   | $\sigma^*$ | 2.12  | 1.25 | 0.046 |
| S36       | LP(1)    | C37-C126  | $\sigma^*$ | 2.11  | 1.26 | 0.046 |
| N40       | LP(1)    | C121-C123 | $\sigma^*$ | 2.03  | 0.83 | 0.039 |
| N40       | LP(1)    | C119-C123 | $\sigma^*$ | 1.92  | 0.84 | 0.038 |
| S29       | LP(1)    | C27-C28   | $\sigma^*$ | 1.86  | 1.23 | 0.043 |
| O107      | LP(1)    | S29-C32   | $\sigma^*$ | 1.78  | 0.94 | 0.037 |
| F114      | LP(1)    | C98-C99   | $\sigma^*$ | 1.63  | 1.63 | 0.046 |
| F115      | LP(1)    | C100-C101 | $\sigma^*$ | 1.63  | 1.63 | 0.046 |
| S29       | LP(2)    | C16-H17   | $\sigma^*$ | 1.55  | 0.71 | 0.033 |
| O107      | LP(1)    | C96-C102  | $\sigma^*$ | 1.31  | 1.18 | 0.036 |
| F115      | LP(1)    | C99-C100  | $\sigma^*$ | 1.05  | 1.59 | 0.037 |
| F114      | LP(1)    | C99-C100  | $\sigma^*$ | 0.98  | 1.59 | 0.036 |
| C25-H26   | $\sigma$ | C102-C103 | $\sigma^*$ | 6.77  | 1.00 | 0.074 |
| C101-H106 | $\sigma$ | C96-C97   | $\sigma^*$ | 5.06  | 1.11 | 0.067 |
| C98-H105  | $\sigma$ | C96-C97   | $\sigma^*$ | 4.00  | 1.11 | 0.06  |
| C116-C118 | $\sigma$ | C118-C121 | $\sigma^*$ | 3.01  | 1.31 | 0.056 |
| C37-C126  | $\sigma$ | C116-C117 | $\sigma^*$ | 2.01  | 1.31 | 0.046 |
| C1-C6     | $\sigma$ | C1-H20    | $\sigma^*$ | 1.00  | 1.15 | 0.03  |
| C30-C32   | $\sigma$ | C27-S29   | $\sigma^*$ | 0.51  | 0.93 | 0.02  |

**TableS27:** Natural bond orbital (NBO) analysis of (MCPTD4)

| Donor(i) | Type  | Acceptor(j) | Type    | E(2)  | E(J)E(i)b(a.u) | F(I→j)e(a.u) |
|----------|-------|-------------|---------|-------|----------------|--------------|
| C25-C103 | $\pi$ | C104-C107   | $\pi^*$ | 26.74 | 0.3            | 0.08         |
| C13-C14  | $\pi$ | C11-C12     | $\pi^*$ | 23.09 | 0.29           | 0.073        |
| C65-C67  | $\pi$ | C60-C64     | $\pi^*$ | 21.00 | 0.3            | 0.072        |
| C4-C5    | $\pi$ | C1-C6       | $\pi^*$ | 20.01 | 0.28           | 0.068        |
| C97-C98  | $\pi$ | C96-C101    | $\pi^*$ | 19.80 | 0.29           | 0.069        |
| C7-C10   | $\pi$ | C2-C3       | $\pi^*$ | 17.53 | 0.31           | 0.069        |
| C2-C3    | $\pi$ | C7-C10      | $\pi^*$ | 16.99 | 0.31           | 0.068        |

|           |       |           |            |       |      |       |
|-----------|-------|-----------|------------|-------|------|-------|
| C8-C9     | $\pi$ | C7-C10    | $\pi^*$    | 15.14 | 0.3  | 0.065 |
| C7-C10    | $\pi$ | C8-C9     | $\pi^*$    | 14.44 | 0.31 | 0.063 |
| C25-C103  | $\pi$ | C27-C28   | $\pi^*$    | 10.71 | 0.29 | 0.052 |
| C11-C12   | $\pi$ | C34-C35   | $\pi^*$    | 9.44  | 0.29 | 0.047 |
| C108-N109 | $\pi$ | C104-C107 | $\pi^*$    | 6.79  | 0.38 | 0.049 |
| C102-O106 | $\pi$ | C96-C101  | $\pi^*$    | 4.22  | 0.41 | 0.041 |
| S29       | LP(2) | C30-C32   | $\pi^*$    | 26.83 | 0.27 | 0.077 |
| S36       | LP(2) | C37-C125  | $\pi^*$    | 23.64 | 0.29 | 0.073 |
| O106      | LP(2) | C96-C102  | $\sigma^*$ | 23.56 | 0.75 | 0.121 |
| F126      | LP(3) | C96-C101  | $\pi^*$    | 23    | 0.46 | 0.1   |
| F113      | LP(3) | C99-C100  | $\pi^*$    | 22.47 | 0.44 | 0.097 |
| S36       | LP(2) | C34-C35   | $\pi^*$    | 22.41 | 0.29 | 0.072 |
| S29       | LP(2) | C27-C28   | $\pi^*$    | 22.27 | 0.26 | 0.069 |
| F114      | LP(3) | C99-C100  | $\pi^*$    | 21.10 | 0.44 | 0.094 |
| O106      | LP(2) | C102-C103 | $\sigma^*$ | 19.08 | 0.75 | 0.109 |
| N40       | LP(1) | C49-C50   | $\pi^*$    | 17.39 | 0.29 | 0.066 |
| N40       | LP(1) | C41-C43   | $\pi^*$    | 14.92 | 0.29 | 0.061 |
| N109      | LP(1) | C107-C108 | $\sigma^*$ | 13.46 | 1.06 | 0.107 |
| N111      | LP(1) | C107-C110 | $\sigma^*$ | 13.45 | 1.06 | 0.107 |
| F126      | LP(2) | C100-C101 | $\sigma^*$ | 8.35  | 0.98 | 0.081 |
| F113      | LP(2) | C99-C100  | $\sigma^*$ | 8.34  | 0.98 | 0.081 |
| F114      | LP(2) | C99-C100  | $\sigma^*$ | 8.04  | 0.98 | 0.079 |
| F114      | LP(2) | C100-C101 | $\sigma^*$ | 8.03  | 0.98 | 0.079 |
| F126      | LP(2) | C96-C101  | $\sigma^*$ | 7.66  | 1.02 | 0.079 |
| F113      | LP(2) | C98-C99   | $\sigma^*$ | 6.7   | 1.01 | 0.074 |
| N40       | LP(1) | C41-C42   | $\sigma^*$ | 4.00  | 0.84 | 0.055 |
| N40       | LP(1) | C41-C43   | $\sigma^*$ | 3.84  | 0.84 | 0.054 |
| O106      | LP(1) | C102-C103 | $\sigma^*$ | 3.81  | 1.18 | 0.06  |
| N40       | LP(1) | C49-C51   | $\sigma^*$ | 3.63  | 0.84 | 0.053 |
| N40       | LP(1) | C49-C50   | $\sigma^*$ | 3.39  | 0.84 | 0.051 |
| O106      | LP(2) | S29-C32   | $\sigma^*$ | 3.35  | 0.51 | 0.038 |
| S29       | LP(1) | C30-C32   | $\sigma^*$ | 2.61  | 1.24 | 0.051 |
| S36       | LP(1) | C34-C35   | $\sigma^*$ | 2.12  | 1.25 | 0.046 |
| S36       | LP(1) | C37-C125  | $\sigma^*$ | 2.10  | 1.26 | 0.046 |
| N40       | LP(1) | C120-C122 | $\sigma^*$ | 2.02  | 0.83 | 0.039 |
| N40       | LP(1) | C118-C122 | $\sigma^*$ | 1.94  | 0.84 | 0.038 |
| S29       | LP(1) | C27-C28   | $\sigma^*$ | 1.85  | 1.23 | 0.043 |
| O106      | LP(1) | S29-C32   | $\sigma^*$ | 1.82  | 0.94 | 0.037 |
| F126      | LP(1) | C96-C101  | $\sigma^*$ | 1.73  | 1.64 | 0.048 |
| F113      | LP(1) | C98-C99   | $\sigma^*$ | 1.65  | 1.63 | 0.046 |
| S29       | LP(2) | C16-H17   | $\sigma^*$ | 1.59  | 0.71 | 0.033 |
| F114      | LP(1) | C99-C100  | $\sigma^*$ | 1.37  | 1.6  | 0.042 |
| F114      | LP(1) | C100-C101 | $\sigma^*$ | 1.37  | 1.61 | 0.042 |

|           |          |           |            |      |      |       |
|-----------|----------|-----------|------------|------|------|-------|
| F126      | LP(1)    | C100-C101 | $\sigma^*$ | 1.18 | 1.6  | 0.039 |
| O106      | LP(1)    | C96-C102  | $\sigma^*$ | 1.17 | 1.18 | 0.033 |
| F113      | LP(1)    | C99-C100  | $\sigma^*$ | 0.94 | 1.6  | 0.035 |
| S29       | LP(1)    | C16-H17   | $\sigma^*$ | 0.67 | 1.13 | 0.024 |
| C25-H26   | $\sigma$ | C102-C103 | $\sigma^*$ | 6.77 | 1    | 0.074 |
| C37-H39   | $\sigma$ | S36-C125  | $\sigma^*$ | 5.20 | 0.74 | 0.056 |
| C12-H23   | $\sigma$ | C13-C14   | $\sigma^*$ | 4.00 | 1.11 | 0.06  |
| C115-C117 | $\sigma$ | C117-C120 | $\sigma^*$ | 3.01 | 1.31 | 0.056 |
| C28-H31   | $\sigma$ | C28-C30   | $\sigma^*$ | 1.00 | 1.13 | 0.03  |
| C28-H31   | $\sigma$ | C25-H26   | $\sigma^*$ | 0.51 | 0.97 | 0.02  |

**TableS28:** Natural bond orbital (NBO) analysis of (MCPTD5)

| Donor(i)  | Type  | Acceptor(j) | Type       | E(2)  | E(J)E(i)b(a.u) | F(I→j)e(a.u) |
|-----------|-------|-------------|------------|-------|----------------|--------------|
| C25-C103  | $\pi$ | C104-C107   | $\pi^*$    | 26.37 | 0.3            | 0.079        |
| C2-C3     | $\pi$ | C1-C6       | $\pi^*$    | 25.7  | 0.28           | 0.077        |
| C62-C63   | $\pi$ | C65-C67     | $\pi^*$    | 22.92 | 0.29           | 0.073        |
| C99-C100  | $\pi$ | C97-C98     | $\pi^*$    | 19.23 | 0.33           | 0.071        |
| C96-C101  | $\pi$ | C102-O106   | $\pi^*$    | 18.94 | 0.3            | 0.07         |
| C34-C35   | $\pi$ | C37-C123    | $\pi^*$    | 16.28 | 0.31           | 0.066        |
| C15-C16   | $\pi$ | C4-C5       | $\pi^*$    | 15.32 | 0.3            | 0.065        |
| C4-C5     | $\pi$ | C15-C16     | $\pi^*$    | 14.42 | 0.3            | 0.063        |
| C57-C73   | $\pi$ | C54-C56     | $\pi^*$    | 13.74 | 0.3            | 0.058        |
| C60-C64   | $\pi$ | C47-C59     | $\pi^*$    | 13.70 | 0.3            | 0.058        |
| C1-C6     | $\pi$ | C30-C32     | $\pi^*$    | 12.75 | 0.27           | 0.053        |
| C104-C107 | $\pi$ | C97-C98     | $\pi^*$    | 9.05  | 0.32           | 0.05         |
| C104-C107 | $\pi$ | C25-C103    | $\pi^*$    | 7.77  | 0.33           | 0.046        |
| C102-O106 | $\pi$ | C96-C101    | $\pi^*$    | 4.16  | 0.43           | 0.041        |
| C102-O106 | $\pi$ | C25-C103    | $\pi^*$    | 3.66  | 0.43           | 0.038        |
| S29       | LP(2) | C30-C32     | $\pi^*$    | 26.8  | 0.27           | 0.077        |
| S36       | LP(2) | C37-C123    | $\pi^*$    | 23.64 | 0.29           | 0.073        |
| S36       | LP(2) | C34-C35     | $\pi^*$    | 22.43 | 0.29           | 0.072        |
| O106      | LP(2) | C96-C102    | $\sigma^*$ | 22.29 | 0.76           | 0.118        |
| S29       | LP(2) | C27-C28     | $\pi^*$    | 22.28 | 0.27           | 0.069        |
| O106      | LP(2) | C102-C103   | $\sigma^*$ | 19.38 | 0.76           | 0.11         |
| N40       | LP(1) | C49-C50     | $\pi^*$    | 17.03 | 0.29           | 0.065        |
| Cl125     | LP(3) | C99-C100    | $\pi^*$    | 16.02 | 0.31           | 0.07         |
| Cl126     | LP(3) | C99-C100    | $\pi^*$    | 15.77 | 0.31           | 0.069        |
| N40       | LP(1) | C41-C43     | $\pi^*$    | 15.26 | 0.29           | 0.061        |
| N109      | LP(1) | C107-C108   | $\sigma^*$ | 13.45 | 1.06           | 0.107        |
| N111      | LP(1) | C107-C110   | $\sigma^*$ | 13.44 | 1.06           | 0.107        |
| Cl125     | LP(2) | C99-C100    | $\sigma^*$ | 5.38  | 0.86           | 0.061        |
| Cl126     | LP(2) | C99-C100    | $\sigma^*$ | 5.25  | 0.86           | 0.06         |
| Cl125     | LP(2) | C100-C101   | $\sigma^*$ | 3.97  | 0.89           | 0.053        |
| N40       | LP(1) | C41-C42     | $\sigma^*$ | 3.95  | 0.84           | 0.055        |

|           |          |           |            |      |      |       |
|-----------|----------|-----------|------------|------|------|-------|
| Cl126     | LP(2)    | C98-C99   | $\sigma^*$ | 3.90 | 0.89 | 0.053 |
| N40       | LP(1)    | C41-C43   | $\sigma^*$ | 3.77 | 0.84 | 0.054 |
| N40       | LP(1)    | C49-C51   | $\sigma^*$ | 3.69 | 0.84 | 0.053 |
| O106      | LP(1)    | C102-C103 | $\sigma^*$ | 3.63 | 1.18 | 0.059 |
| N40       | LP(1)    | C49-C50   | $\sigma^*$ | 3.44 | 0.84 | 0.051 |
| O106      | LP(2)    | S29-C32   | $\sigma^*$ | 3.19 | 0.51 | 0.037 |
| S29       | LP(1)    | C30-C32   | $\sigma^*$ | 2.59 | 1.24 | 0.051 |
| S36       | LP(1)    | C34-C35   | $\sigma^*$ | 2.12 | 1.25 | 0.046 |
| S36       | LP(1)    | C37-C123  | $\sigma^*$ | 2.10 | 1.26 | 0.046 |
| N40       | LP(1)    | C118-C120 | $\sigma^*$ | 2.02 | 0.83 | 0.039 |
| N40       | LP(1)    | C116-C120 | $\sigma^*$ | 1.96 | 0.84 | 0.039 |
| S29       | LP(1)    | C27-C28   | $\sigma^*$ | 1.86 | 1.23 | 0.043 |
| O106      | LP(1)    | S29-C32   | $\sigma^*$ | 1.79 | 0.94 | 0.037 |
| S29       | LP(2)    | C16-H17   | $\sigma^*$ | 1.63 | 0.71 | 0.034 |
| Cl125     | LP(1)    | C100-C101 | $\sigma^*$ | 1.45 | 1.51 | 0.042 |
| Cl126     | LP(1)    | C98-C99   | $\sigma^*$ | 1.45 | 1.50 | 0.042 |
| Cl125     | LP(1)    | C99-C100  | $\sigma^*$ | 1.37 | 1.47 | 0.041 |
| O106      | LP(1)    | C96-C102  | $\sigma^*$ | 1.31 | 1.18 | 0.036 |
| Cl126     | LP(1)    | C99-C100  | $\sigma^*$ | 1.29 | 1.47 | 0.039 |
| O106      | LP(1)    | C96-C102  | $\sigma^*$ | 1.17 | 1.18 | 0.033 |
| F113      | LP(1)    | C99-C100  | $\sigma^*$ | 0.94 | 1.60 | 0.035 |
| S29       | LP(1)    | C16-H17   | $\sigma^*$ | 0.69 | 1.13 | 0.025 |
| S29       | LP(1)    | C16-H17   | $\sigma^*$ | 0.67 | 1.13 | 0.024 |
| Cl126     | LP(2)    | C97-C98   | $\sigma^*$ | 0.54 | 0.91 | 0.02  |
| Cl125     | LP(2)    | C96-C101  | $\sigma^*$ | 0.52 | 0.93 | 0.02  |
| C25-H26   | $\sigma$ | C102-C103 | $\sigma^*$ | 6.74 | 1.00 | 0.074 |
| C57-C73   | $\sigma$ | C57-C71   | $\sigma^*$ | 4.91 | 1.3  | 0.071 |
| C65-H69   | $\sigma$ | C62-C63   | $\sigma^*$ | 3.78 | 1.13 | 0.058 |
| C34-C35   | $\sigma$ | C37-H39   | $\sigma^*$ | 2.77 | 1.18 | 0.051 |
| C102-O106 | $\sigma$ | C102-C103 | $\sigma^*$ | 1.69 | 1.57 | 0.047 |
| C30-C32   | $\sigma$ | C27-S29   | $\sigma^*$ | 0.52 | 0.93 | 0.02  |

**Table S29:** Natural bond orbital (NBO) analysis of (MCPTD6)

| Donor(i) | Type  | Acceptor(j) | Type    | E(2)  | E(J)E(i)b(a.u) | F(I→j)e(a.u) |
|----------|-------|-------------|---------|-------|----------------|--------------|
| C25-C103 | $\pi$ | C104-C107   | $\pi^*$ | 27.31 | 0.29           | 0.08         |
| C97-C98  | $\pi$ | C96-C101    | $\pi^*$ | 23.00 | 0.28           | 0.073        |
| C65-C67  | $\pi$ | C60-C64     | $\pi^*$ | 21.00 | 0.3            | 0.072        |
| C4-C5    | $\pi$ | C1-C6       | $\pi^*$ | 20.00 | 0.28           | 0.068        |
| C99-C100 | $\pi$ | C96-C101    | $\pi^*$ | 18.31 | 0.32           | 0.069        |
| C99-C100 | $\pi$ | C97-C98     | $\pi^*$ | 18.25 | 0.33           | 0.07         |
| C37-C123 | $\pi$ | C34-C35     | $\pi^*$ | 17.83 | 0.31           | 0.069        |
| C8-C9    | $\pi$ | C7-C10      | $\pi^*$ | 15.13 | 0.3            | 0.065        |
| C7-C10   | $\pi$ | C8-C9       | $\pi^*$ | 14.46 | 0.31           | 0.063        |
| C11-C12  | $\pi$ | C34-C35     | $\pi^*$ | 9.02  | 0.29           | 0.046        |

|           |       |           |              |       |      |       |
|-----------|-------|-----------|--------------|-------|------|-------|
| C104-C107 | $\pi$ | C25-C103  | $\pi^*$      | 7.97  | 0.33 | 0.047 |
| C110-N111 | $\pi$ | C108-N109 | $\pi^*$      | 0.72  | 0.46 | 0.016 |
| S29       | LP(2) | C30-C32   | $\pi^*$      | 26.90 | 0.27 | 0.077 |
| O106      | LP(2) | C96-C102  | $\partial^*$ | 23.96 | 0.74 | 0.121 |
| S36       | LP(2) | C37-C123  | $\pi^*$      | 23.65 | 0.29 | 0.074 |
| S36       | LP(2) | C34-C35   | $\pi^*$      | 22.48 | 0.29 | 0.072 |
| S29       | LP(2) | C27-C28   | $\pi^*$      | 22.22 | 0.26 | 0.069 |
| O106      | LP(2) | C102-C103 | $\partial^*$ | 18.85 | 0.76 | 0.109 |
| N40       | LP(1) | C49-C50   | $\pi^*$      | 17.21 | 0.29 | 0.065 |
| Cl124     | LP(3) | C99-C100  | $\pi^*$      | 16.58 | 0.31 | 0.071 |
| Cl125     | LP(3) | C99-C100  | $\pi^*$      | 16.33 | 0.31 | 0.07  |
| Cl126     | LP(3) | C96-C101  | $\pi^*$      | 15.86 | 0.34 | 0.071 |
| N40       | LP(1) | C41-C43   | $\pi^*$      | 15.19 | 0.29 | 0.061 |
| N109      | LP(1) | C107-C108 | $\sigma^*$   | 13.50 | 1.06 | 0.107 |
| N111      | LP(1) | C107-C110 | $\sigma^*$   | 13.47 | 1.06 | 0.107 |
| Cl125     | LP(2) | C99-C100  | $\sigma^*$   | 5.47  | 0.86 | 0.061 |
| Cl126     | LP(2) | C100-C101 | $\sigma^*$   | 5.18  | 0.85 | 0.059 |
| Cl124     | LP(2) | C100-C101 | $\sigma^*$   | 5.11  | 0.85 | 0.059 |
| Cl124     | LP(2) | C99-C100  | $\sigma^*$   | 5.02  | 0.86 | 0.059 |
| Cl126     | LP(2) | C96-C101  | $\sigma^*$   | 4.75  | 0.9  | 0.059 |
| N40       | LP(1) | C41-C42   | $\sigma^*$   | 3.95  | 0.84 | 0.055 |
| N40       | LP(1) | C41-C43   | $\sigma^*$   | 3.80  | 0.84 | 0.054 |
| Cl125     | LP(2) | C98-C99   | $\sigma^*$   | 3.73  | 0.89 | 0.052 |
| N40       | LP(1) | C49-C51   | $\sigma^*$   | 3.66  | 0.84 | 0.053 |
| O106      | LP(1) | C102-C103 | $\sigma^*$   | 3.63  | 1.18 | 0.059 |
| N40       | LP(1) | C49-C50   | $\sigma^*$   | 3.42  | 0.84 | 0.051 |
| O106      | LP(2) | S29-C32   | $\sigma^*$   | 3.23  | 0.51 | 0.037 |
| S29       | LP(1) | C30-C32   | $\sigma^*$   | 2.60  | 1.24 | 0.051 |
| S36       | LP(1) | C34-C35   | $\sigma^*$   | 2.13  | 1.25 | 0.046 |
| S36       | LP(1) | C37-C123  | $\sigma^*$   | 2.11  | 1.26 | 0.046 |
| N40       | LP(1) | C118-C120 | $\sigma^*$   | 2.04  | 0.83 | 0.039 |
| N40       | LP(1) | C116-C120 | $\sigma^*$   | 1.96  | 0.84 | 0.039 |
| S29       | LP(1) | C27-C28   | $\sigma^*$   | 1.85  | 1.23 | 0.043 |
| O106      | LP(1) | S29-C32   | $\sigma^*$   | 1.82  | 0.94 | 0.037 |
| S29       | LP(2) | C16-H17   | $\sigma^*$   | 1.70  | 0.71 | 0.034 |
| Cl126     | LP(1) | C96-C101  | $\sigma^*$   | 1.56  | 1.52 | 0.044 |
| Cl124     | LP(1) | C99-C100  | $\sigma^*$   | 1.48  | 1.48 | 0.042 |
| Cl125     | LP(1) | C98-C99   | $\sigma^*$   | 1.47  | 1.51 | 0.042 |
| Cl124     | LP(1) | C100-C101 | $\sigma^*$   | 1.46  | 1.47 | 0.042 |
| Cl126     | LP(1) | C100-C101 | $\sigma^*$   | 1.41  | 1.47 | 0.041 |
| Cl125     | LP(1) | C99-C100  | $\sigma^*$   | 1.27  | 1.47 | 0.039 |
| O106      | LP(1) | C96-C102  | $\sigma^*$   | 1.24  | 1.16 | 0.034 |
| S29       | LP(1) | C16-H17   | $\sigma^*$   | 0.75  | 1.13 | 0.026 |



|           |          |           |            |      |      |       |
|-----------|----------|-----------|------------|------|------|-------|
| C25-H26   | $\sigma$ | C102-C103 | $\sigma^*$ | 6.84 | 1    | 0.074 |
| C108-N109 | $\sigma$ | C107-C108 | $\sigma^*$ | 6.28 | 1.57 | 0.089 |
| C35-C37   | $\sigma$ | C113-C123 | $\sigma^*$ | 4.70 | 1.2  | 0.067 |
| C3-C4     | $\sigma$ | C3-C7     | $\sigma^*$ | 3.01 | 1.24 | 0.055 |
| C35-H38   | $\sigma$ | C34-C35   | $\sigma^*$ | 2.01 | 1.12 | 0.042 |
| C25-H26   | $\sigma$ | C25-C27   | $\sigma^*$ | 1.00 | 1.08 | 0.03  |

**TableS30:** Natural bond orbital (NBO) analysis of (MCPTD7)

| <b>Donor(i)</b> | <b>Type</b> | <b>Acceptor(j)</b> | <b>Type</b> | <b>E(2)</b> | <b>E(J)E(i)b(a.u)</b> | <b>F(I→j)e(a.u)</b> |
|-----------------|-------------|--------------------|-------------|-------------|-----------------------|---------------------|
| C25-C103        | $\pi$       | C104-C107          | $\pi^*$     | 27.52       | 0.29                  | 0.08                |
| C54-C56         | $\pi$       | C49-C50            | $\pi^*$     | 23.06       | 0.28                  | 0.072               |
| C62-C63         | $\pi$       | C65-C67            | $\pi^*$     | 22.93       | 0.29                  | 0.073               |
| C65-C67         | $\pi$       | C60-C64            | $\pi^*$     | 21.00       | 0.3                   | 0.072               |
| C49-C50         | $\pi$       | C51-C53            | $\pi^*$     | 20.04       | 0.3                   | 0.069               |
| C8-C9           | $\pi$       | C13-C14            | $\pi^*$     | 19.75       | 0.29                  | 0.068               |
| C96-C101        | $\pi$       | C102-O106          | $\pi^*$     | 17.64       | 0.3                   | 0.068               |
| C27-C28         | $\pi$       | C30-C32            | $\pi^*$     | 16.7        | 0.29                  | 0.063               |
| C7-C10          | $\pi$       | C3-C4              | $\pi^*$     | 15.97       | 0.31                  | 0.067               |
| C5-C6           | $\pi$       | C15-C16            | $\pi^*$     | 15.34       | 0.31                  | 0.065               |
| C102-O106       | $\pi$       | C96-C101           | $\pi^*$     | 4.25        | 0.42                  | 0.041               |
| C102-O106       | $\pi$       | C25-C103           | $\pi^*$     | 3.66        | 0.43                  | 0.038               |
| C30-C32         | $\pi$       | C30-C32            | $\pi^*$     | 1.12        | 0.29                  | 0.016               |
| C49-C50         | $\pi$       | C41-C43            | $\pi^*$     | 0.72        | 0.29                  | 0.013               |
| C108-N109       | $\pi$       | C110-N111          | $\pi^*$     | 0.70        | 0.46                  | 0.016               |
| S36             | LP(2)       | C37-C123           | $\pi^*$     | 27.26       | 0.29                  | 0.074               |
| O106            | LP(2)       | C96-C102           | $\sigma^*$  | 23.68       | 0.75                  | 0.118               |
| S36             | LP(2)       | C34-C35            | $\pi^*$     | 22.80       | 0.29                  | 0.072               |
| S29             | LP(2)       | C27-C28            | $\pi^*$     | 22.41       | 0.26                  | 0.068               |
| O106            | LP(2)       | C102-C103          | $\sigma^*$  | 21.90       | 0.76                  | 0.11                |
| O106            | LP(2)       | S29-C32            | $\sigma^*$  | 19.20       | 0.51                  | 0.036               |
| S29             | LP(2)       | C16-H17            | $\sigma^*$  | 16.94       | 0.71                  | 0.034               |
| N40             | LP(1)       | C116-C120          | $\pi^*$     | 14.83       | 0.29                  | 0.085               |
| N40             | LP(1)       | C49-C50            | $\pi^*$     | 13.51       | 0.29                  | 0.065               |
| N40             | LP(1)       | C41-C43            | $\pi^*$     | 13.48       | 0.29                  | 0.06                |
| N109            | LP(1)       | C107-C108          | $\sigma^*$  | 13.2        | 1.06                  | 0.107               |
| N111            | LP(1)       | C107-C110          | $\sigma^*$  | 13.18       | 1.06                  | 0.107               |
| N128            | LP(1)       | C99-C127           | $\sigma^*$  | 4.00        | 1.06                  | 0.106               |
| N126            | LP(1)       | C100-C125          | $\sigma^*$  | 3.85        | 1.07                  | 0.106               |
| N40             | LP(1)       | C41-C42            | $\sigma^*$  | 3.69        | 0.84                  | 0.055               |
| N40             | LP(1)       | C41-C43            | $\sigma^*$  | 3.67        | 0.84                  | 0.054               |
| N40             | LP(1)       | C49-C51            | $\sigma^*$  | 3.45        | 0.84                  | 0.053               |
| O106            | LP(1)       | C102-C103          | $\sigma^*$  | 3.11        | 1.19                  | 0.06                |
| N40             | LP(1)       | C49-C50            | $\sigma^*$  | 2.59        | 0.84                  | 0.051               |
| S29             | LP(1)       | C30-C32            | $\sigma^*$  | 2.12        | 1.23                  | 0.051               |

|           |          |           |            |      |      |       |
|-----------|----------|-----------|------------|------|------|-------|
| S36       | LP(1)    | C34-C35   | $\sigma^*$ | 2.11 | 1.25 | 0.046 |
| S36       | LP(1)    | C37-C123  | $\sigma^*$ | 1.96 | 1.26 | 0.046 |
| N40       | LP(1)    | C118-C120 | $\sigma^*$ | 1.88 | 0.83 | 0.039 |
| N40       | LP(1)    | C116-C120 | $\sigma^*$ | 1.86 | 0.84 | 0.038 |
| S29       | LP(1)    | C27-C28   | $\sigma^*$ | 1.74 | 1.22 | 0.043 |
| O106      | LP(1)    | S29-C32   | $\sigma^*$ | 1.65 | 0.94 | 0.036 |
| O106      | LP(1)    | C96-C102  | $\sigma^*$ | 1.30 | 1.17 | 0.035 |
| C25-H26   | $\sigma$ | C102-C103 | $\sigma^*$ | 6.66 | 1.01 | 0.074 |
| C73-C76   | $\sigma$ | C56-C57   | $\sigma^*$ | 4.88 | 1.23 | 0.069 |
| C12-H23   | $\sigma$ | C13-C14   | $\sigma^*$ | 4.00 | 1.11 | 0.06  |
| C13-C14   | $\sigma$ | C8-C14    | $\sigma^*$ | 3.98 | 1.28 | 0.064 |
| C35-H38   | $\sigma$ | C34-C35   | $\sigma^*$ | 2.00 | 1.12 | 0.042 |
| C114-H117 | $\sigma$ | C113-C114 | $\sigma^*$ | 1.00 | 1.11 | 0.03  |

**Table S31:** Natural bond orbital (NBO) analysis of (MCPTD8)

| Donor(i)  | Type  | Acceptor(j) | Type       | E(2)  | E(J)E(i)b(a.u) | F(I→j)e(a.u) |
|-----------|-------|-------------|------------|-------|----------------|--------------|
| C25-C103  | $\pi$ | C104-C107   | $\pi^*$    | 25.87 | 0.3            | 0.079        |
| C116-C120 | $\pi$ | C113-C114   | $\pi^*$    | 24.29 | 0.30           | 0.077        |
| C71-C72   | $\pi$ | C74-C76     | $\pi^*$    | 22.92 | 0.29           | 0.073        |
| C49-C50   | $\pi$ | C54-C56     | $\pi^*$    | 22.50 | 0.31           | 0.076        |
| C115-C118 | $\pi$ | C116-C120   | $\pi^*$    | 21.37 | 0.29           | 0.073        |
| C62-C63   | $\pi$ | C60-C64     | $\pi^*$    | 21.01 | 0.3            | 0.072        |
| C51-C53   | $\pi$ | C54-C56     | $\pi^*$    | 20.99 | 0.31           | 0.073        |
| C97-C98   | $\pi$ | C104-C107   | $\pi^*$    | 20.16 | 0.29           | 0.068        |
| C2-C3     | $\pi$ | C4-C5       | $\pi^*$    | 19.60 | 0.29           | 0.068        |
| C96-C101  | $\pi$ | C97-C98     | $\pi^*$    | 17.98 | 0.31           | 0.067        |
| C8-C9     | $\pi$ | C7-C10      | $\pi^*$    | 15.05 | 0.3            | 0.064        |
| C7-C10    | $\pi$ | C8-C9       | $\pi^*$    | 14.47 | 0.31           | 0.064        |
| C60-C64   | $\pi$ | C47-C59     | $\pi^*$    | 13.69 | 0.3            | 0.058        |
| C127-C129 | $\pi$ | C90-C100    | $\pi^*$    | 18.35 | 0.29           | 0.069        |
| C113-C114 | $\pi$ | C37-C123    | $\pi^*$    | 15.88 | 0.28           | 0.060        |
| C99-C100  | $\pi$ | C96-C101    | $\pi^*$    | 17.47 | 0.29           | 0.068        |
| C99-C100  | $\pi$ | C97-C98     | $\pi^*$    | 18.22 | 0.29           | 0.068        |
| C99-C100  | $\pi$ | C125-C131   | $\pi^*$    | 16.27 | 0.29           | 0.066        |
| C97-C98   | $\pi$ | C96-C101    | $\pi^*$    | 17.72 | 0.32           | 0.068        |
| C97-C98   | $\pi$ | C99-C100    | $\pi^*$    | 16.43 | 0.30           | 0.066        |
| S29       | LP(2) | C27-C28     | $\pi^*$    | 22.47 | 0.27           | 0.069        |
| S36       | LP(2) | C34-C35     | $\pi^*$    | 22.55 | 0.29           | 0.72         |
| S36       | LP(2) | C37-C123    | $\pi^*$    | 23.61 | 0.29           | 0.73         |
| N40       | LP(1) | C41-C43     | $\pi^*$    | 15.85 | 0.29           | 0.063        |
| N40       | LP(1) | C49-C50     | $\pi^*$    | 3.08  | 0.84           | 0.049        |
| N40       | LP(1) | C49-C50     | $\pi^*$    | 19.20 | 0.29           | 0.069        |
| O106      | LP(2) | C96-C102    | $\sigma^*$ | 21.67 | 0.77           | 0.117        |
| O106      | LP(2) | C102-C103   | $\sigma^*$ | 19.44 | 0.75           | 0.110        |

|           |          |           |            |       |      |       |
|-----------|----------|-----------|------------|-------|------|-------|
| N109      | LP(1)    | C107-C108 | $\sigma^*$ | 13.38 | 1.07 | 0.107 |
| N111      | LP(1)    | C107-C110 | $\sigma^*$ | 13.40 | 1.07 | 0.107 |
| O106      | LP(1)    | C102-C103 | $\sigma^*$ | 3.61  | 1.18 | 0.059 |
| N40       | LP(1)    | C41-C42   | $\sigma^*$ | 3.87  | 0.84 | 0.054 |
| C50-C56   | $\sigma$ | C54-C56   | $\sigma^*$ | 4.99  | 1.3  | 0.072 |
| C2-H21    | $\sigma$ | C1-C6     | $\sigma^*$ | 4.20  | 1.09 | 0.060 |
| C2-H21    | $\sigma$ | C3-C4     | $\sigma^*$ | 4.71  | 1.09 | 0.064 |
| C25-C103  | $\sigma$ | C25-C27   | $\sigma^*$ | 4.37  | 1.30 | 0.067 |
| C27-C28   | $\sigma$ | C25-C27   | $\sigma^*$ | 4.18  | 1.27 | 0.065 |
| C57-C71   | $\sigma$ | C50-C56   | $\sigma^*$ | 4.10  | 1.29 | 0.065 |
| C57-C71   | $\sigma$ | C57-C73   | $\sigma^*$ | 4.36  | 1.28 | 0.067 |
| C7-H19    | $\sigma$ | C9-C10    | $\sigma^*$ | 4.76  | 1.07 | 0.064 |
| C8-C14    | $\sigma$ | C8-C9     | $\sigma^*$ | 3.63  | 1.25 | 0.060 |
| C10-H22   | $\sigma$ | C3-C7     | $\sigma^*$ | 4.67  | 1.08 | 0.063 |
| C15-C18   | $\sigma$ | C8-C14    | $\sigma^*$ | 4.33  | 1.10 | 0.062 |
| C15-C18   | $\sigma$ | C5-C16    | $\sigma^*$ | 4.89  | 1.07 | 0.064 |
| C57-C73   | $\sigma$ | C54-C56   | $\sigma^*$ | 4.08  | 1.24 | 0.063 |
| C56-C57   | $\sigma$ | C50-C56   | $\sigma^*$ | 3.69  | 1.26 | 0.061 |
| C57-C71   | $\sigma$ | C50-C56   | $\sigma^*$ | 4.10  | 1.29 | 0.065 |
| C42-C44   | $\sigma$ | N40-C41   | $\sigma^*$ | 4.09  | 1.13 | 0.061 |
| C127-H128 | $\sigma$ | C129-C131 | $\sigma^*$ | 4.00  | 1.09 | 0.059 |
| C99-C100  | $\sigma$ | C100-C101 | $\sigma^*$ | 3.00  | 1.25 | 0.055 |
| N40-C49   | $\sigma$ | C116-C120 | $\sigma^*$ | 2.01  | 1.35 | 0.047 |
| N40-C41   | $\sigma$ | N40-C49   | $\sigma^*$ | 1.98  | 1.2  | 0.044 |
| C1-C6     | $\sigma$ | C1-H20    | $\sigma^*$ | 1.00  | 1.15 | 0.03  |

<sup>a</sup> E (2) means energy of hyper conjugative interaction (stabilization energy).

<sup>b</sup> Energy difference between donor and acceptor i and j NBO orbitals.

<sup>c</sup> F(i→j) is the Fock matrix element between i and j NBO orbitals.

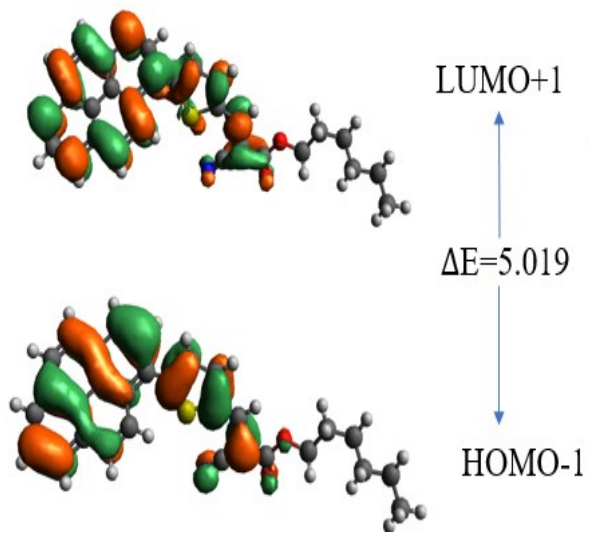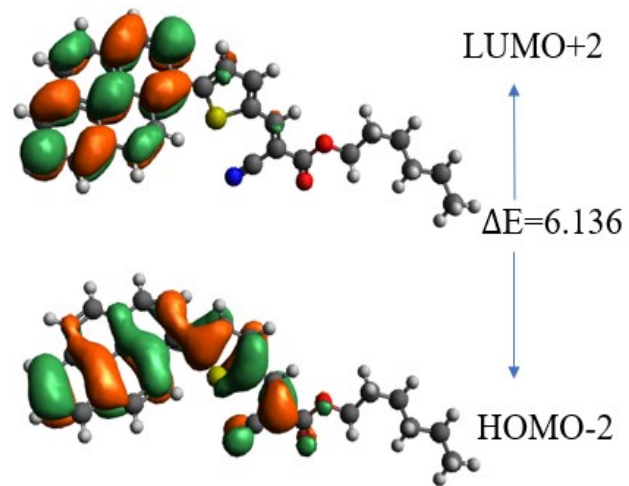

**MCPTR**

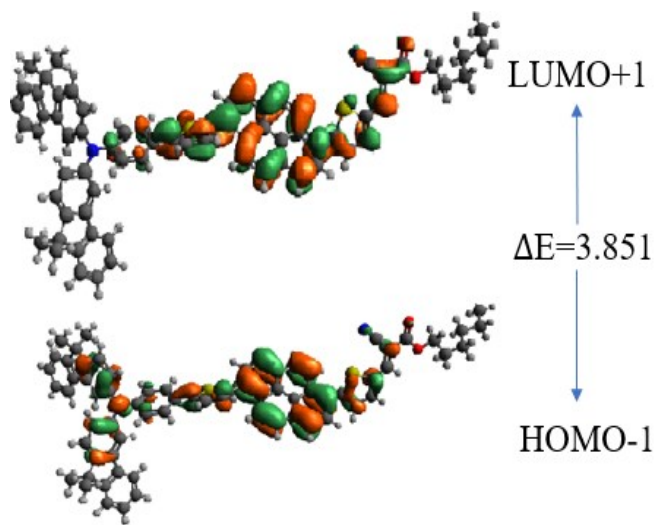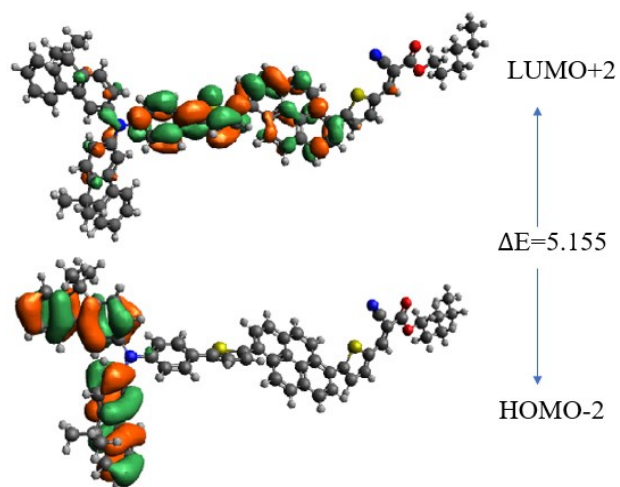

**MCPTD1**

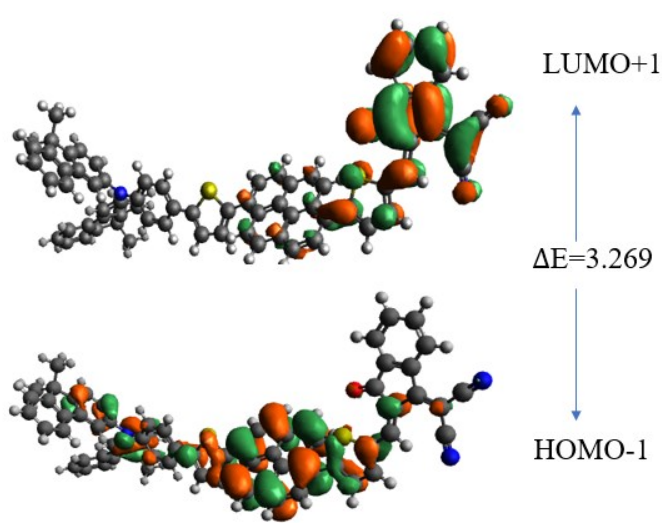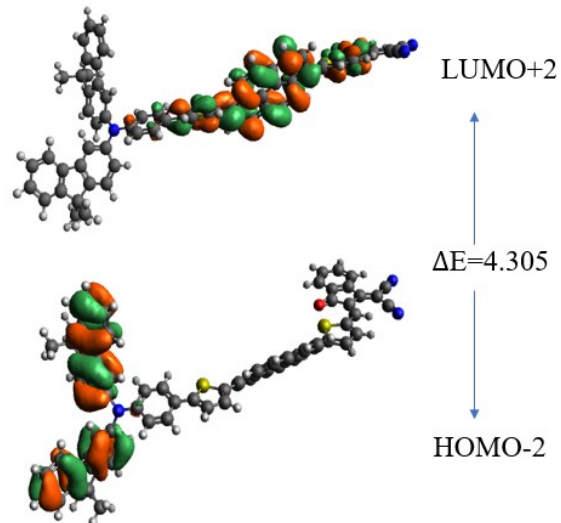

**MCPTD2**

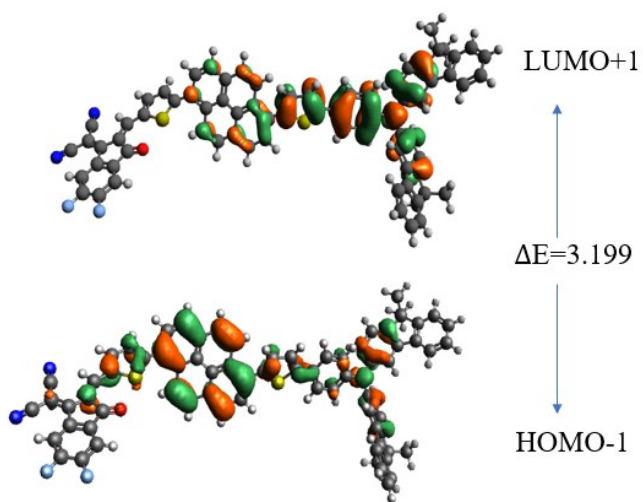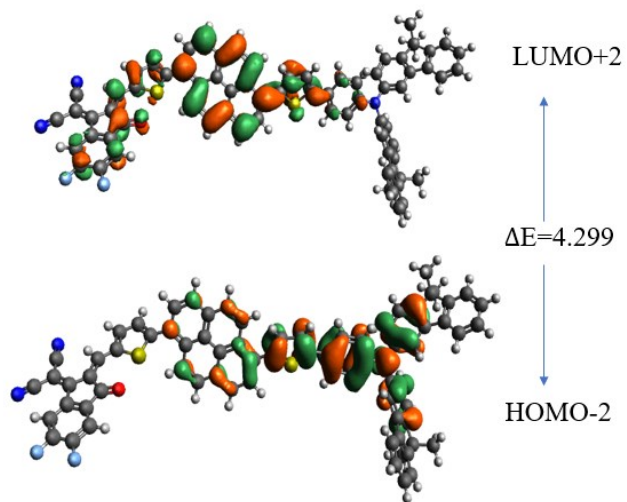

**MCPTD3**

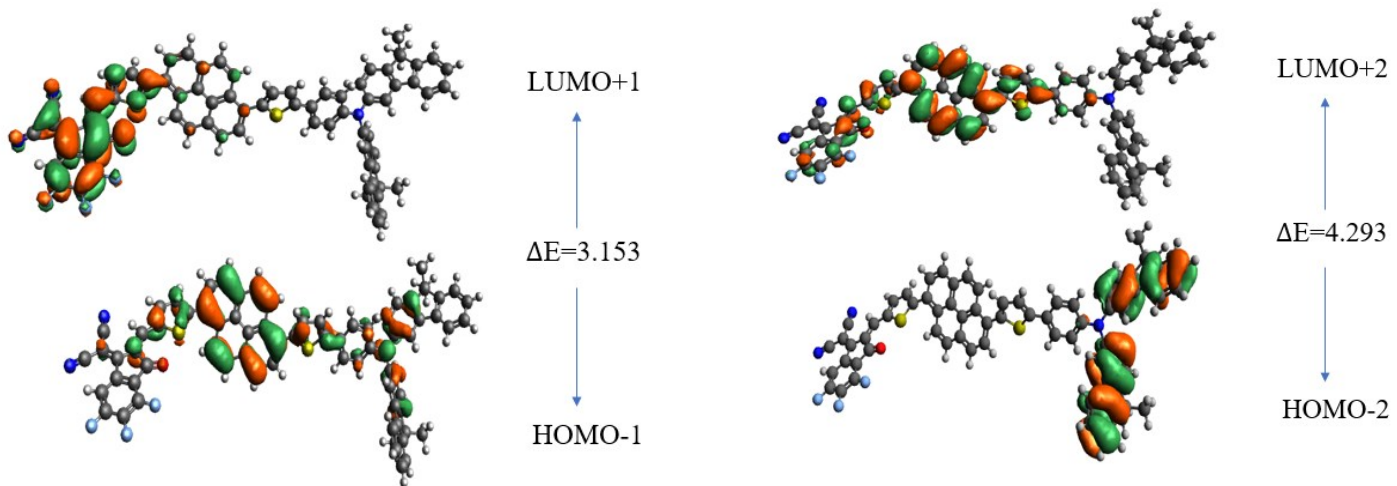

**MCPTD4**

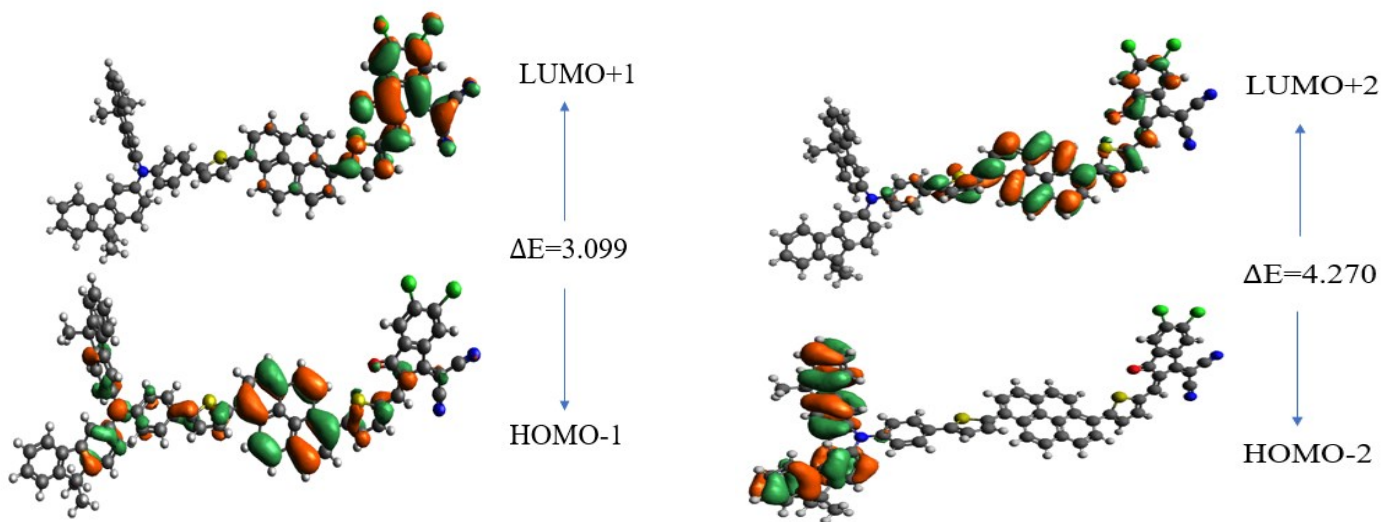

**MCPTD5**

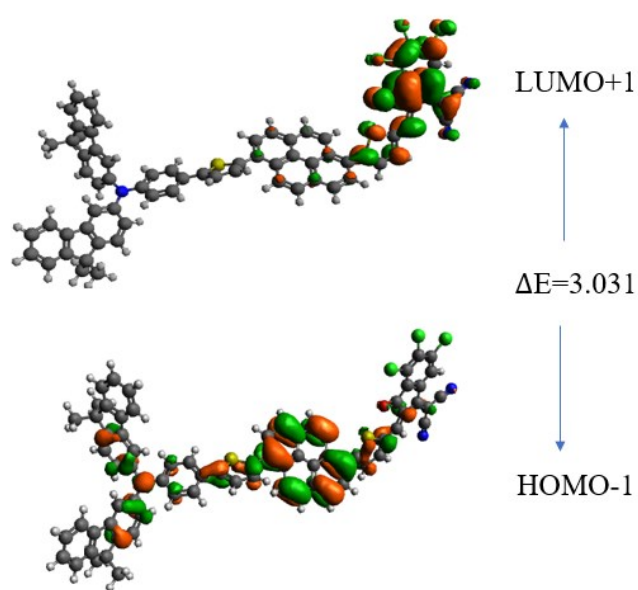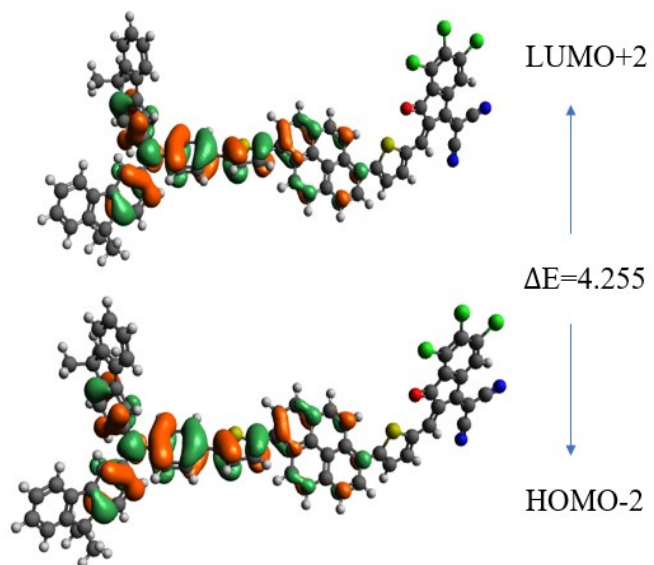

### MCPTD6

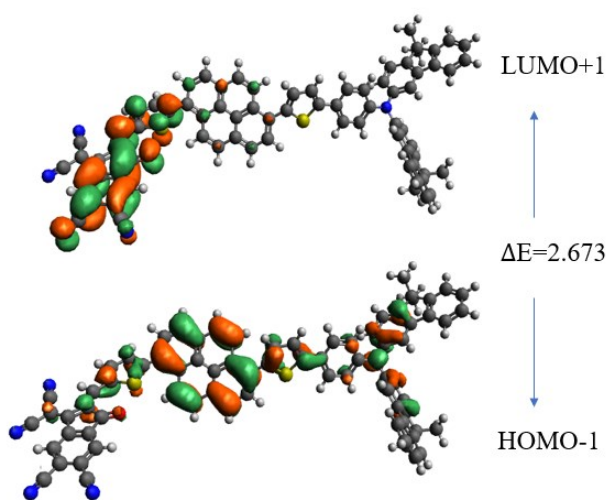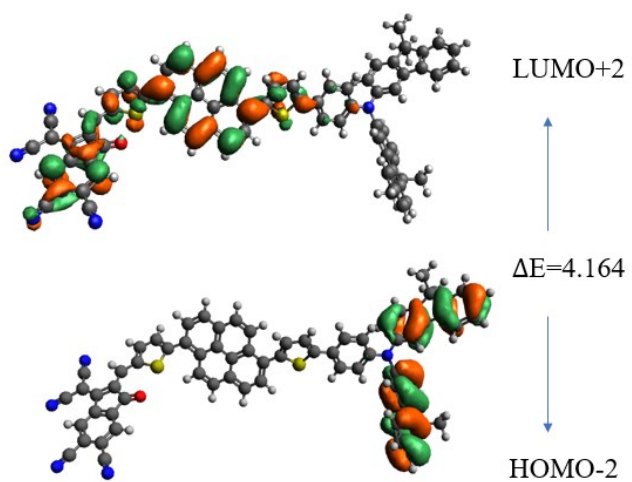

### MCPTD7

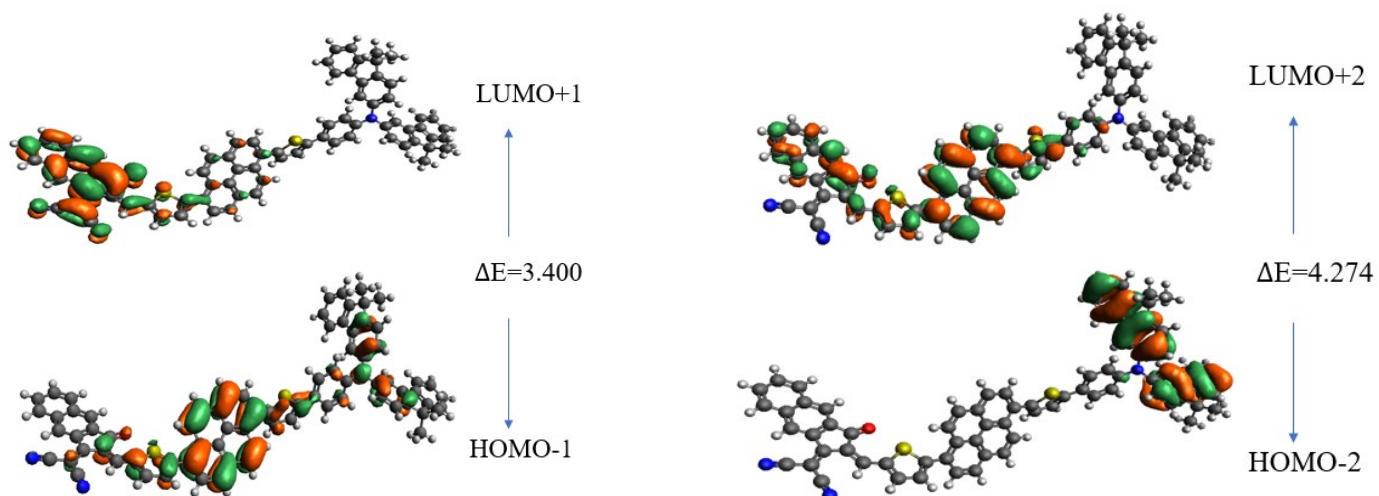

### MCPTD8

**Figure S1:** Pictographic display of HOMO and LUMO of MCPTR-MCPTD8

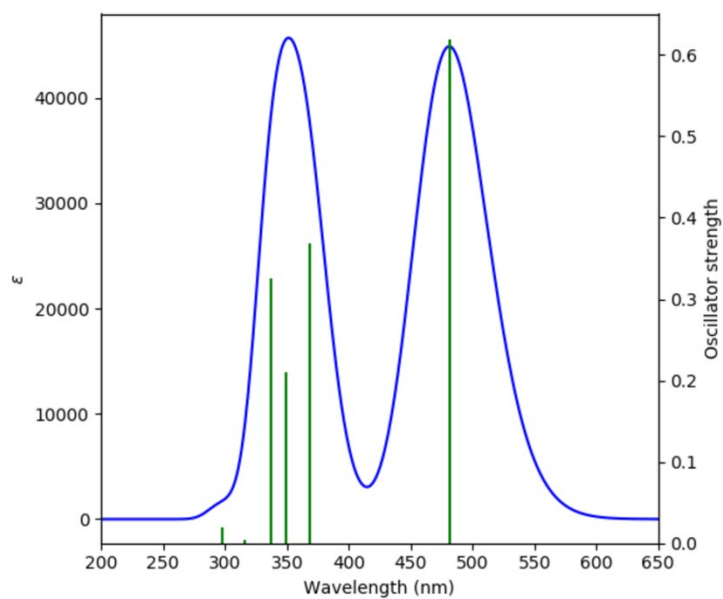

**Figure S2:** Graph of investigated compound MCPTR



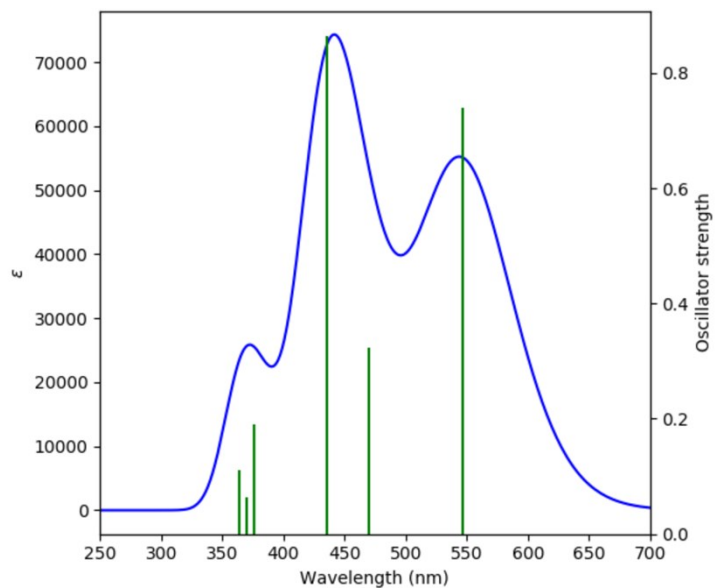

**Figure S3:** Graph of investigated compound **MCPTD1**

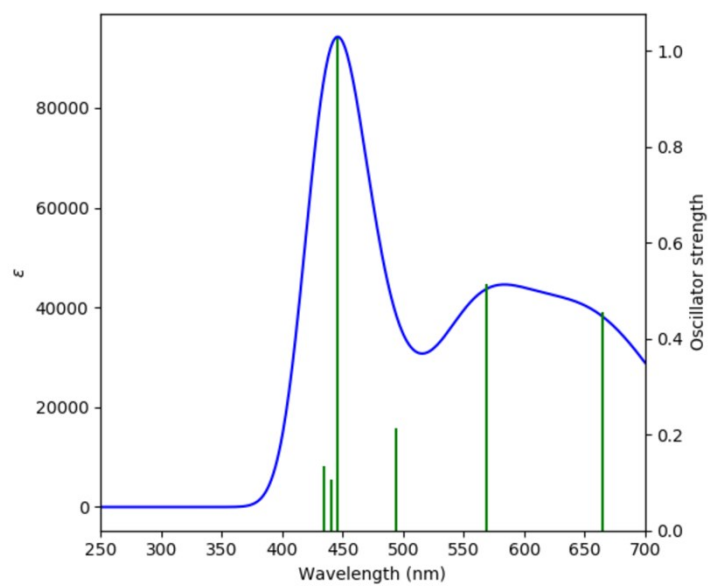

**Figure S4:** Graph of investigated compound **MCPTD2**

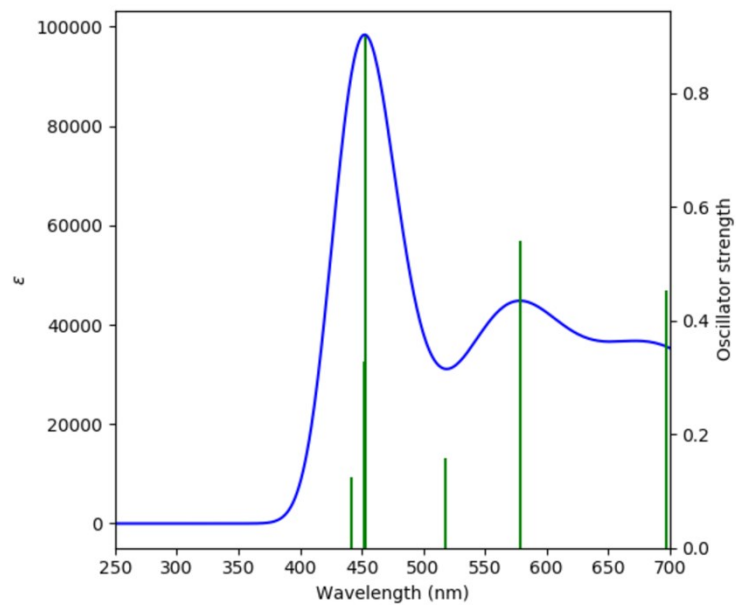

**Figure S5:** Graph of investigated compound **MCPTD3**

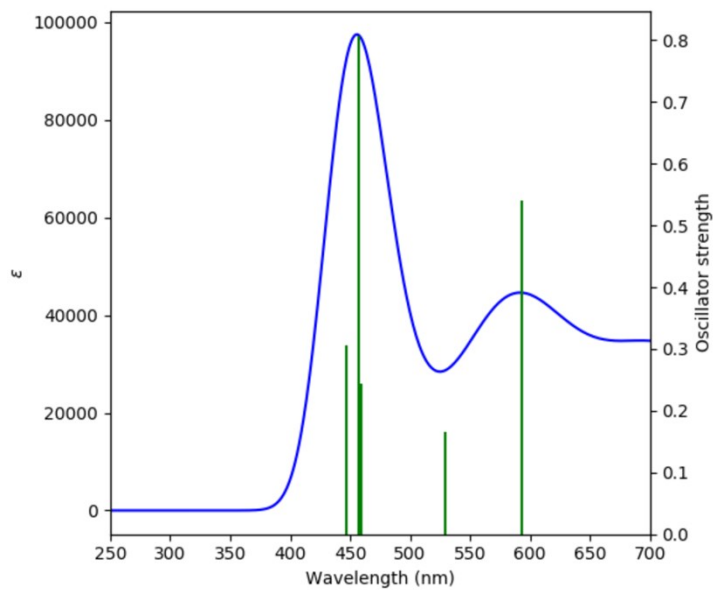

**Figure S6:** Graph of investigated compound **MCPTD4**

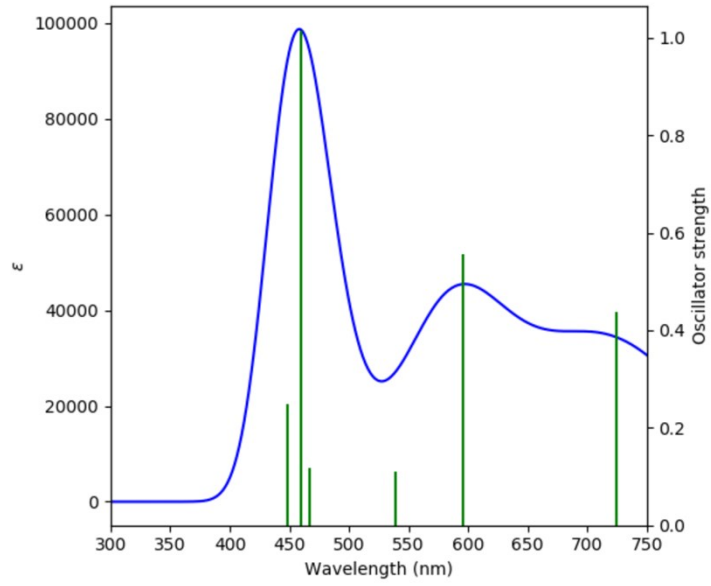

**Figure S7:** Graph of investigated compound **MCPTD5**

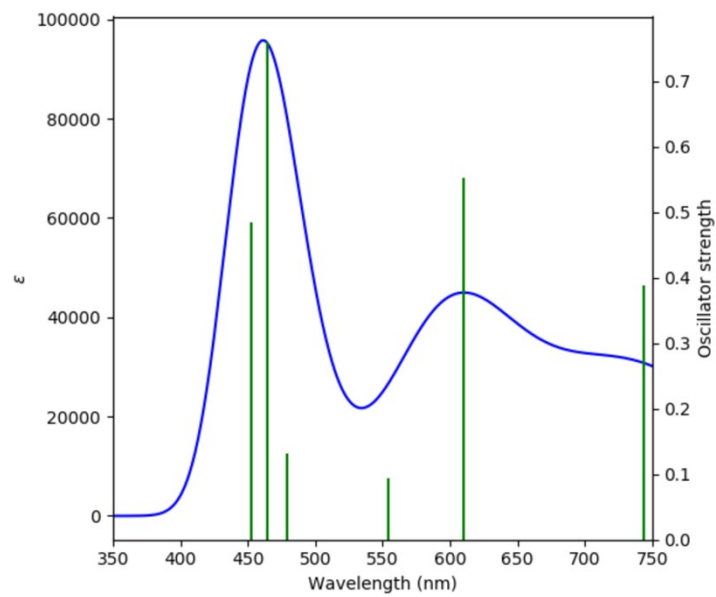

**Figure S8:** Graph of investigated compound **MCPTD6**

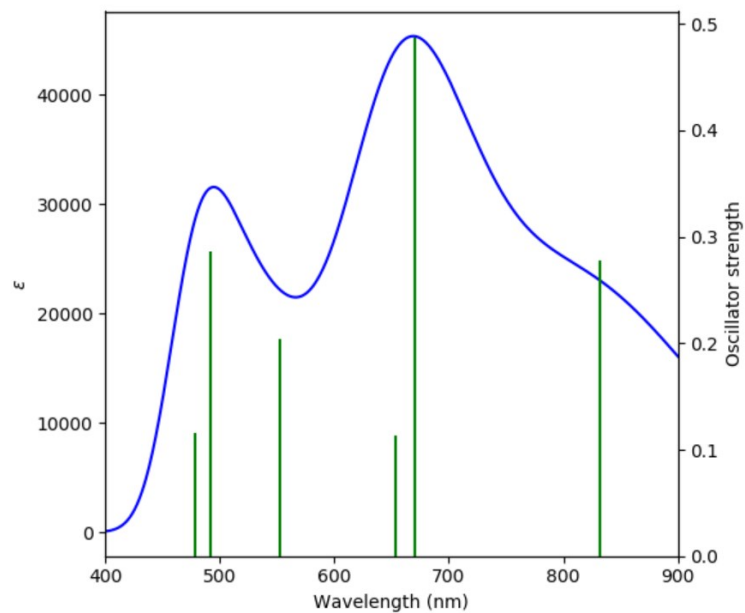

**Figure S9:** Graph of investigated compound **MCPTD7**

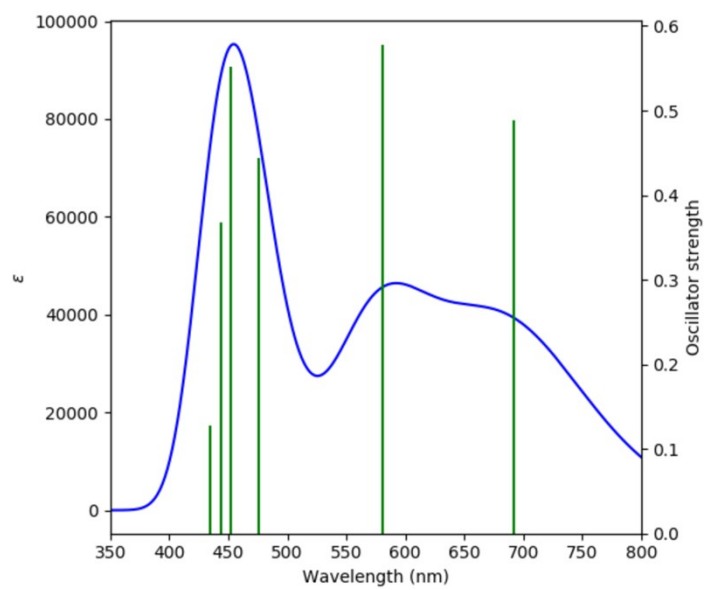

**Figure S10:** Graph of investigated compound **MCPTD8**
